# Supplementary material
Source: publisher figshare collection journal article supplement (https://acs.figshare.com/ndownloader/files/3599106)
Supplement: Supplementary file 1 [file 3599106]

## Total Synthesis, Stereochemical Assignment, and Biological Activity of All Known (–)-Trigonoliimines

Sunkyu Han,<sup>a</sup> Karen C. Morrison,<sup>b</sup> Paul J. Hergenrother,<sup>b</sup> and Mohammad Movassaghi<sup>\*a</sup>

<sup>a</sup>*Department of Chemistry, Massachusetts Institute of Technology, Cambridge, Massachusetts 02139, USA*

<sup>b</sup>*Department of Chemistry, University of Illinois at Urbana-Champaign, Urbana, Illinois 61801, USA*

*movassag@mit.edu*

### Supporting Information

|                                                                                                                               |    |
|-------------------------------------------------------------------------------------------------------------------------------|----|
| General Procedures                                                                                                            | S2 |
| Materials                                                                                                                     | S2 |
| Instrumentation                                                                                                               | S2 |
| Positional Numbering System                                                                                                   | S2 |
| Our Hypothesis for the Formation of Calycanthaceous Alkaloids from the Oxidation and Rearrangement of Bistryptamine <b>S1</b> | S3 |
| Copy of <sup>1</sup> H, <sup>13</sup> C NMR Spectra and HPLC data                                                             | S4 |

**General Procedures.** All reactions were performed in oven-dried or flame-dried round-bottomed flasks. The flasks were fitted with rubber septa and reactions were conducted under a positive pressure of argon. Stainless steel syringes or cannulae were used to transfer air- and moisture-sensitive liquids. Where necessary (so noted), solutions were deoxygenated by argon purging for a minimum of 10 min. Flash column chromatography was performed as described by Still et al. using silica gel (60-Å pore size, 40–63 µm, 4–6% H<sub>2</sub>O content).<sup>1</sup> Analytical thin-layer chromatography (TLC) was performed using glass plates pre-coated with 0.25 mm 230–400 mesh silica gel impregnated with a fluorescent indicator (254 nm). Thin layer chromatography plates were visualized by exposure to ultraviolet light and/or by exposure to an aqueous solution of ceric ammonium molybdate (CAM) on a hot plate (~250 °C). Organic solutions were concentrated at 29–33 °C on rotary evaporators capable of achieving a minimum pressure of ~2 torr.

**Materials.** Commercial reagents and solvents were used as received with the following exceptions: dichloromethane, tetrahydrofuran, acetonitrile, toluene, methanol, and dimethylformamide were purified by the method of Grubbs et al. under positive argon pressure.<sup>2</sup>

**Instrumentation.** Proton (<sup>1</sup>H) and carbon (<sup>13</sup>C) nuclear magnetic resonance spectra were recorded with 500 MHz NMR spectrometers. Proton nuclear magnetic resonance (<sup>1</sup>H NMR) spectra are reported in parts per million on the δ scale and are referenced from the residual protium in the NMR solvent (CDCl<sub>3</sub>: δ 7.24 (CHCl<sub>3</sub>), CD<sub>3</sub>OD: δ 3.31 (CHD<sub>2</sub>OD), DMSO-*d*<sub>6</sub>: δ 2.50 (DMSO-*d*<sub>5</sub>)). Data is reported as follows: chemical shift [multiplicity (s = singlet, d = doublet, t = triplet, q = quartet, m = multiplet, app = apparent, br = broad), coupling constant(s) in Hertz, integration, assignment].

<sup>1</sup> Still, W. C.; Kahn, M.; Mitra, A. *J. Org. Chem.* **1978**, *43*, 2923–2925.

<sup>2</sup> Pangborn, A. B.; Giardello, M. A.; Grubbs, R. H.; Rosen, R. K.; Timmers, F. J. *Organometallics* **1996**, *15*, 1518–1520.

Carbon-13 nuclear magnetic resonance ( $^{13}\text{C}$  NMR) spectra are reported in parts per million on the  $\delta$  scale and are referenced from the carbon resonances of the solvent ( $\text{CDCl}_3$ :  $\delta$  77.23,  $\text{CD}_3\text{OD}$ :  $\delta$  49.15,  $\text{DMSO}-d_6$ :  $\delta$  39.51). Data is reported as follows: chemical shift or chemical shift (assignment). Infrared data (IR) are reported as follows: [frequency of absorption ( $\text{cm}^{-1}$ ), intensity of absorption (s = strong, m = medium, w = weak, br = broad)]. Specific rotations are reported as follows: [wavelength of light, temperature ( $^{\circ}\text{C}$ ), specific rotation, concentration in grams/100 mL of solution, solvent]. High-resolution mass spectrometric data (HRMS) were recorded using electrospray ionization (ESI) source or direct analysis in real time (DART) ionization source.

**Positional Numbering System.** In assigning the  $^1\text{H}$  and  $^{13}\text{C}$  NMR data of all intermediates en route to our total synthesis of (–)-1, (–)-2, (–)-3, and (–)-4, we have employed a uniform numbering system consistent with that of the final targets.

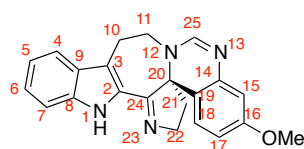

(–)-trigonoliimine A (1)

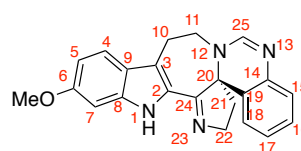

(–)-trigonoliimine B (2)

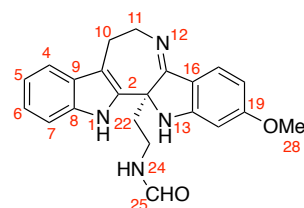

(–)-trigonoliimine C (3)

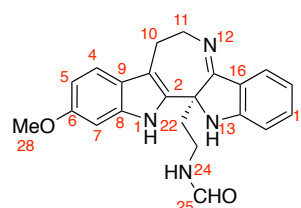

(–)-isotrigonoliimine C (4)

## Inspiration for the oxidation and rearrangement approach.

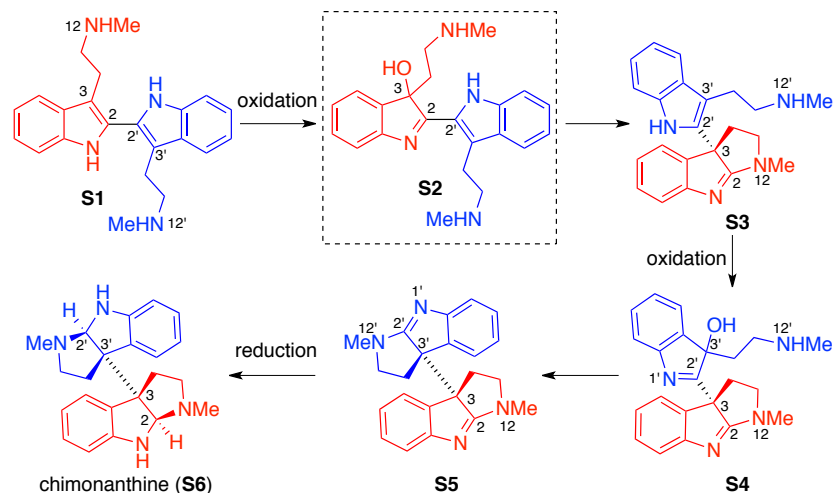

**Scheme S1.** Our original hypothesis for the oxidation and rearrangement of bistryptamine **S1** to access the calycanthaceous alkaloids.

In 2008, our laboratory provided a hypothesis for a strategy toward the calycanthaceous alkaloids from oxidation and rearrangement of a 2,2'-bistryptamine derivative (Scheme S1).<sup>3</sup> We expected that the oxidation of 2,2'-bistryptamine **S1** would afford mono-oxidized hydroxyindolenine **S2**, which after 1,2-aryl shift followed by cyclization of the amine moiety to the carbonyl group of the resulting oxindole intermediate would give imine **S3**. After another round of oxidation and rearrangement followed by reduction step, we envisioned the formation of chimonanthine (**S6**). Interestingly, at the time we envisioned this approach the trigonoliimine alkaloids were not known; however, their isolation prompted our reinvestigation of this approach in their context enabling the program discussed in this report.

<sup>3</sup> Schmidt, M. A.; Movassaghi, M. *Synlett* **2008**, 313–324.

| Parameter              | Value             |
|------------------------|-------------------|
| Origin                 | Varian            |
| Spectrometer           | inova             |
| Solvent                | CDCl <sub>3</sub> |
| Temperature            | 30.0              |
| Pulse Sequence         | s2pul             |
| Experiment             | 1D                |
| Number of Scans        | 8                 |
| Receiver Gain          | 40                |
| Relaxation Delay       | 0.1000            |
| Pulse Width            | 0.0000            |
| Spectrometer Frequency | 500.43            |
| Spectral Width         | 12012.0           |
| Lowest Frequency       | –524.3            |
| Nucleus                | <sup>1</sup> H    |
| Acquired Size          | 60051             |
| Spectral Size          | 131072            |

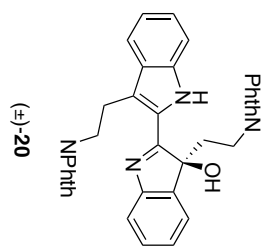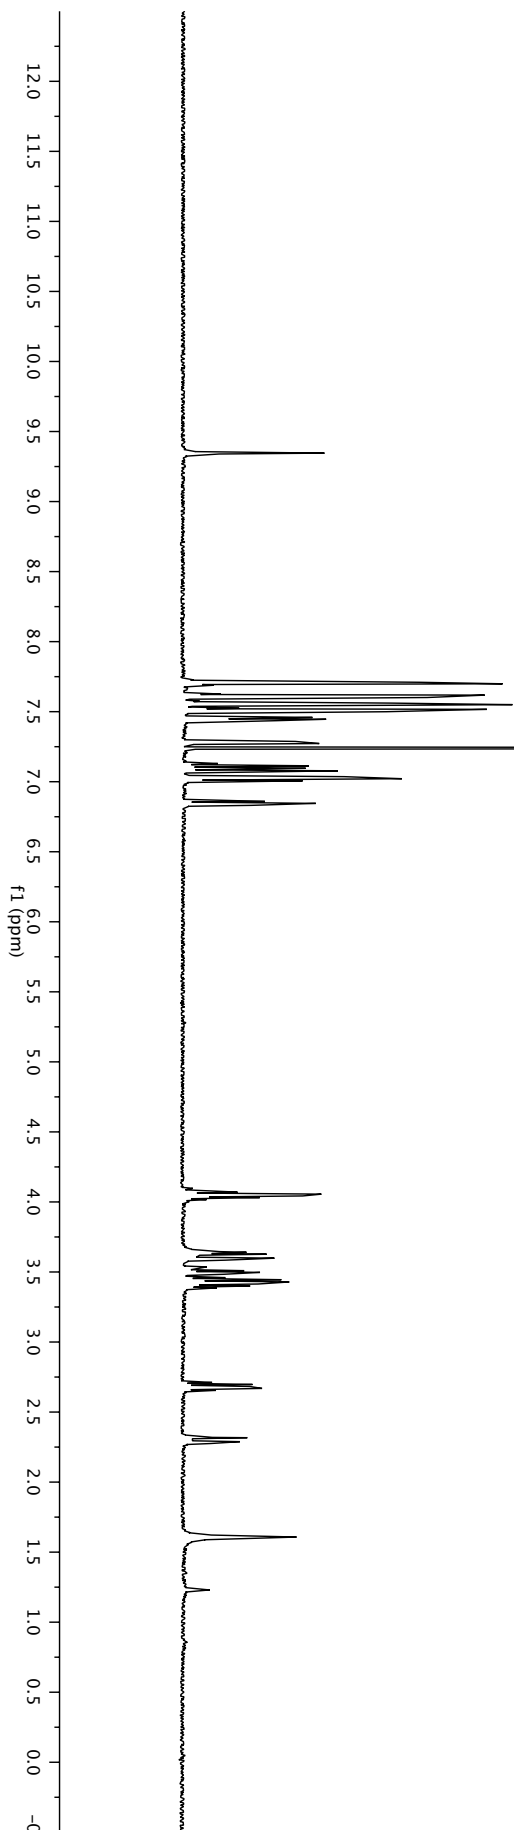

| Parameter              | Value          |
|------------------------|----------------|
| Origin                 | Varian         |
| Spectrometer           | inova          |
| Solvent                | DMSO           |
| Temperature            | 30.0           |
| Pulse Sequence         | s 2pul         |
| Experiment             | 1D             |
| Number of Scans        | 20             |
| Receiver Gain          | 22             |
| Relaxation Delay       | 0.1000         |
| Pulse Width            | 0.0000         |
| Spectrometer Frequency | 500.43         |
| Spectral Width         | 12012.0        |
| Lowest Frequency       | –504.9         |
| Nucleus                | <sup>1</sup> H |
| Acquired Size          | 60051          |
| Spectral Size          | 131072         |

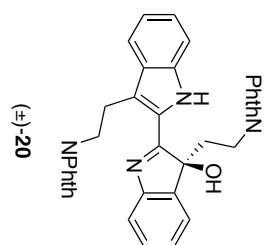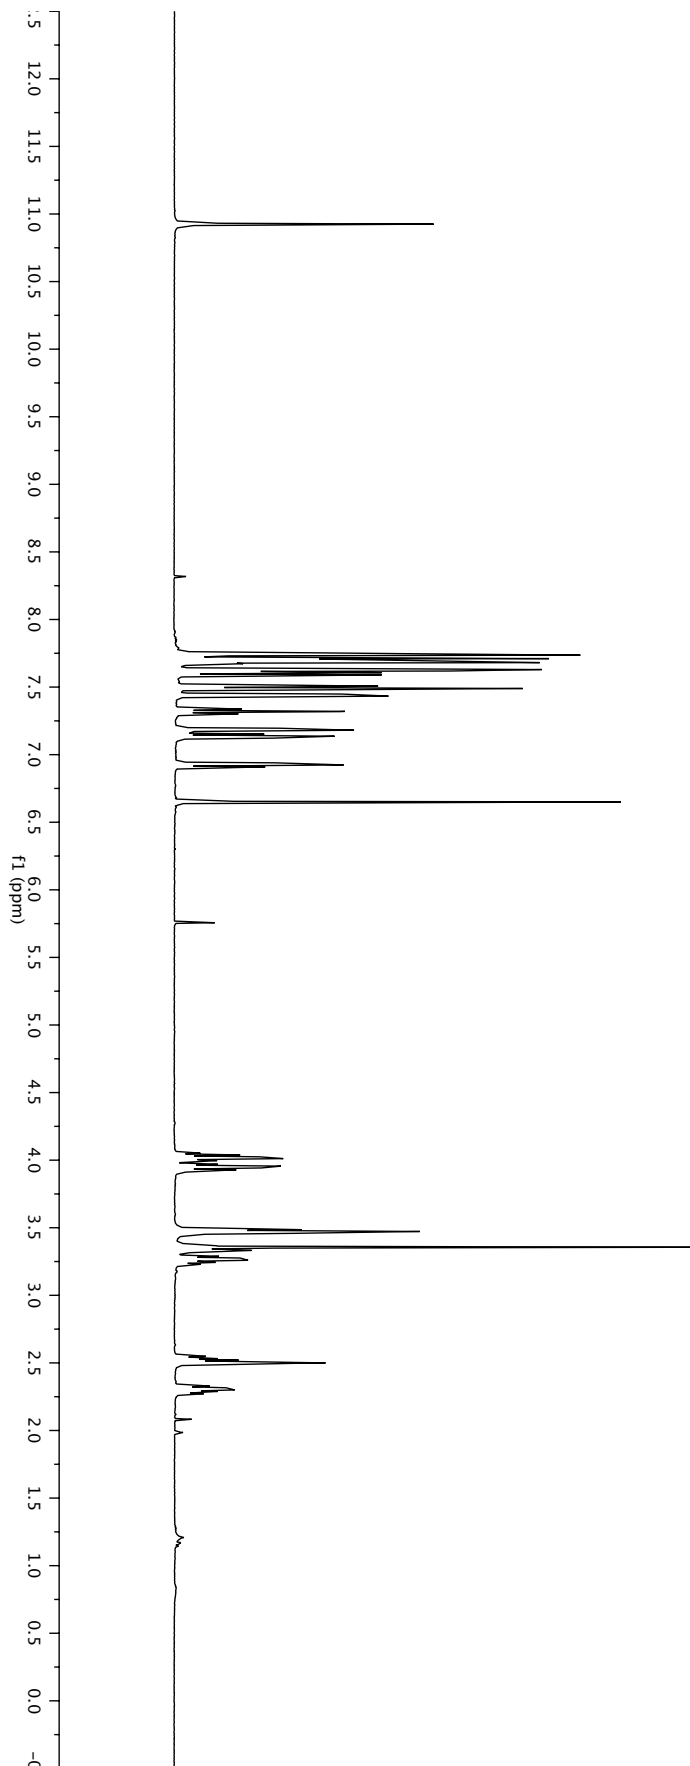

| Parameter              | Value             |
|------------------------|-------------------|
| Origin                 | Varian            |
| Spectrometer           | inova             |
| Solvent                | CDCl <sub>3</sub> |
| Temperature            | 27.0              |
| Pulse Sequence         | s2pul             |
| Experiment             | 1D                |
| Number of Scans        | 12716             |
| Receiver Gain          | 60                |
| Relaxation Delay       | 0.7633            |
| Pulse Width            | 0.0000            |
| Spectrometer Frequency | 125.79            |
| Spectral Width         | 37735.8           |
| Lowest Frequency       | –6285.7           |
| Nucleus                | <sup>13</sup> C   |
| Acquired Size          | 65505             |
| Spectral Size          | 131072            |

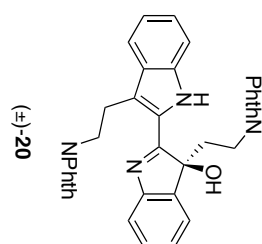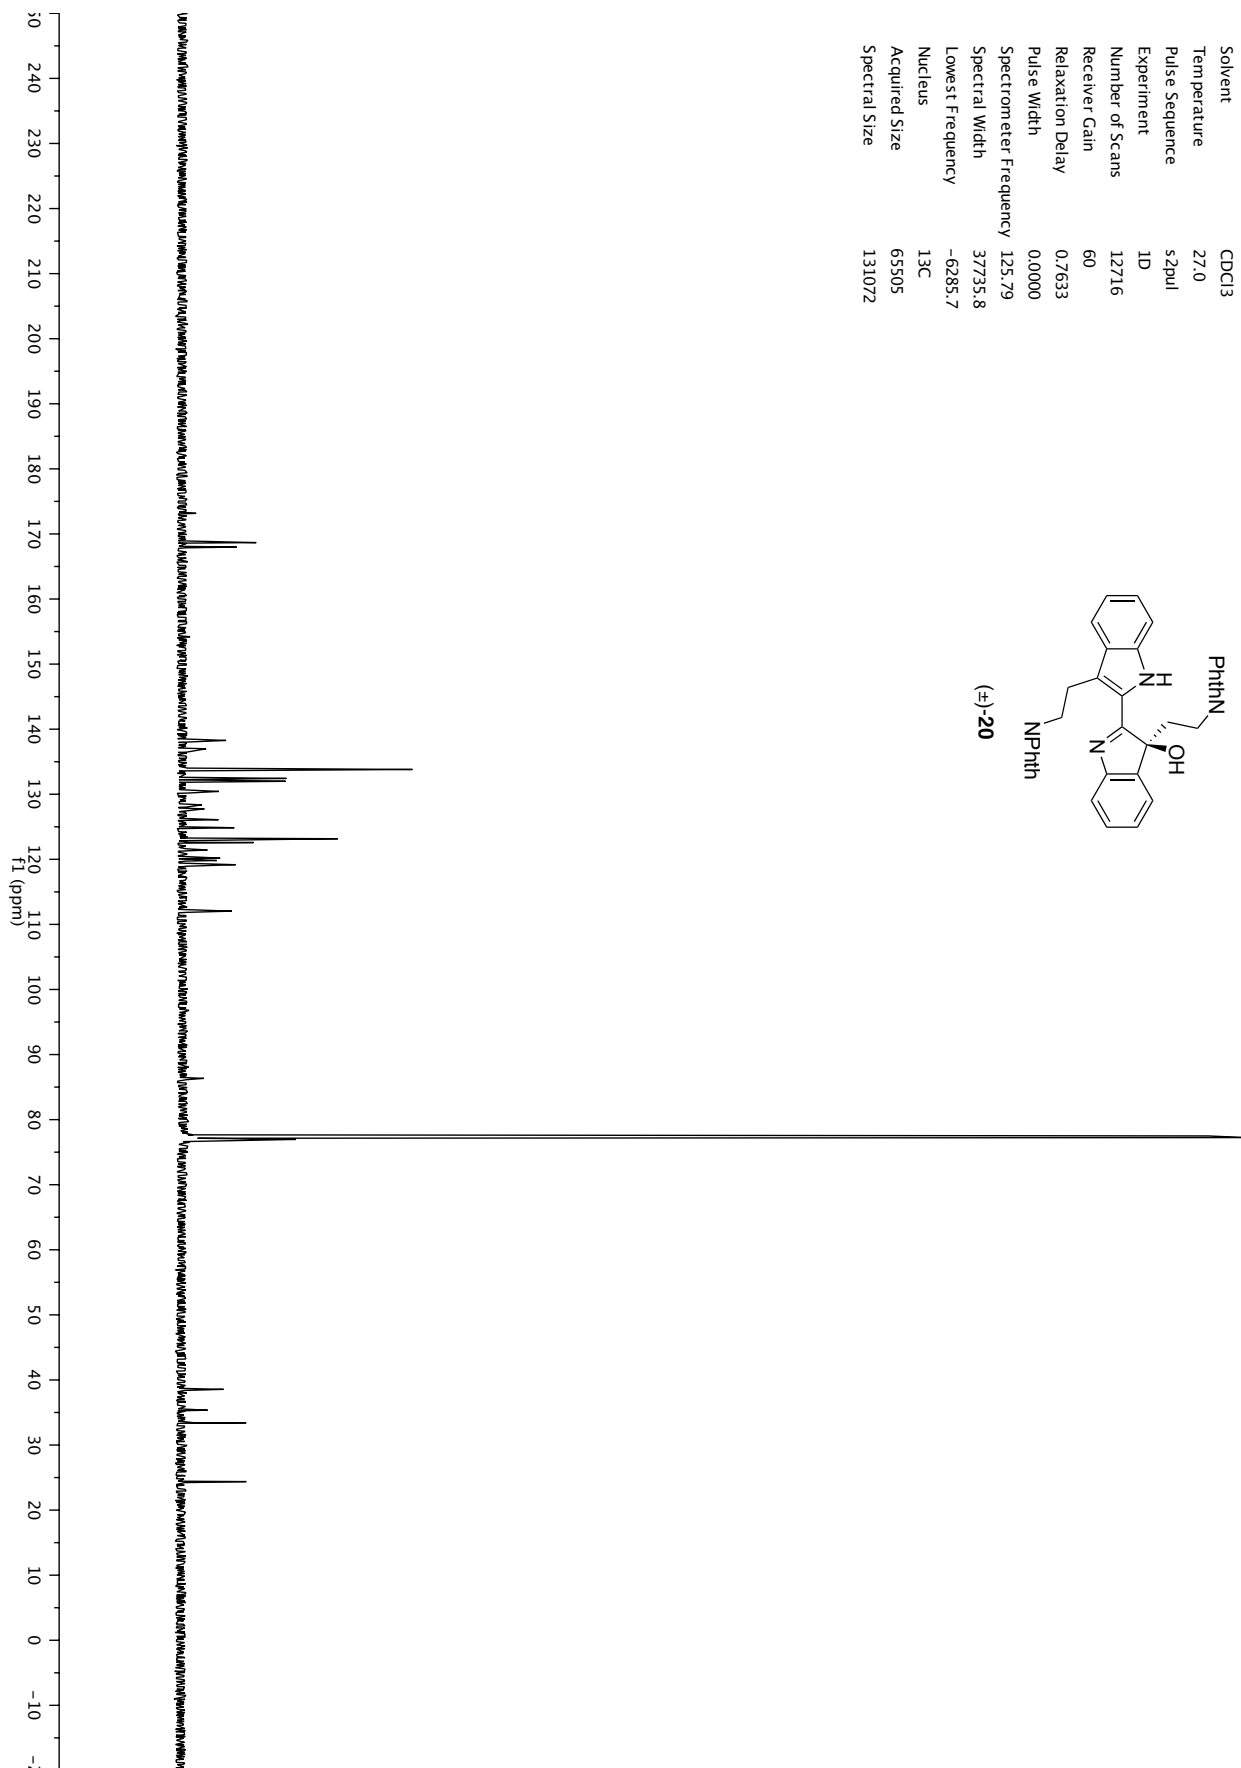

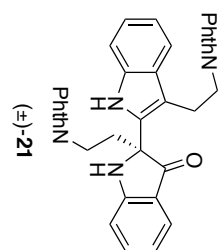

| Parameter              | Value             |
|------------------------|-------------------|
| Origin                 | Varian            |
| Spectrometer           | inova             |
| Solvent                | CDCl <sub>3</sub> |
| Temperature            | 30.0              |
| Pulse Sequence         | s 2pul            |
| Experiment             | 1D                |
| Number of Scans        | 10                |
| Receiver Gain          | 28                |
| Relaxation Delay       | 0.1000            |
| Pulse Width            | 0.0000            |
| Spectrometer Frequency | 500.43            |
| Spectral Width         | 12012.0           |
| Lowest Frequency       | –524.3            |
| Nucleus                | <sup>1</sup> H    |
| Acquired Size          | 60051             |
| Spectral Size          | 131072            |

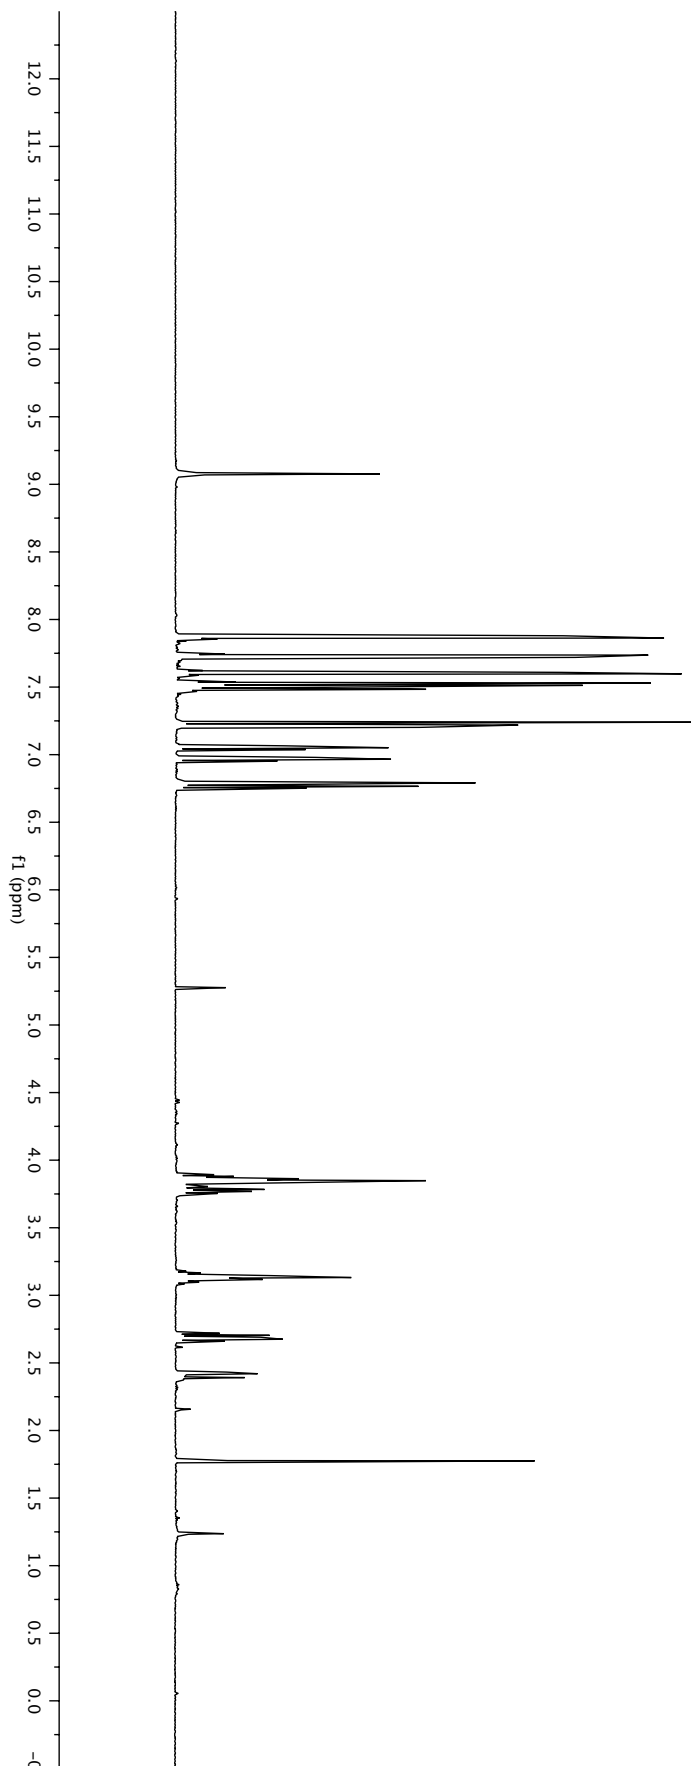

| Parameter              | Value             |
|------------------------|-------------------|
| Origin                 | Varian            |
| Spectrometer           | inova             |
| Solvent                | CDCl <sub>3</sub> |
| Temperature            | 15.0              |
| Pulse Sequence         | s 2pul            |
| Experiment             | 1D                |
| Number of Scans        | 80                |
| Receiver Gain          | 60                |
| Relaxation Delay       | 0.7633            |
| Pulse Width            | 0.0000            |
| Spectrometer Frequency | 125.79            |
| Spectral Width         | 37735.8           |
| Lowest Frequency       | –6289.1           |
| Nucleus                | <sup>13</sup> C   |
| Acquired Size          | 65505             |
| Spectral Size          | 131072            |

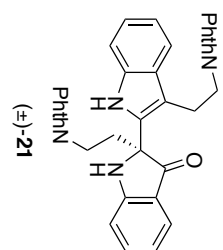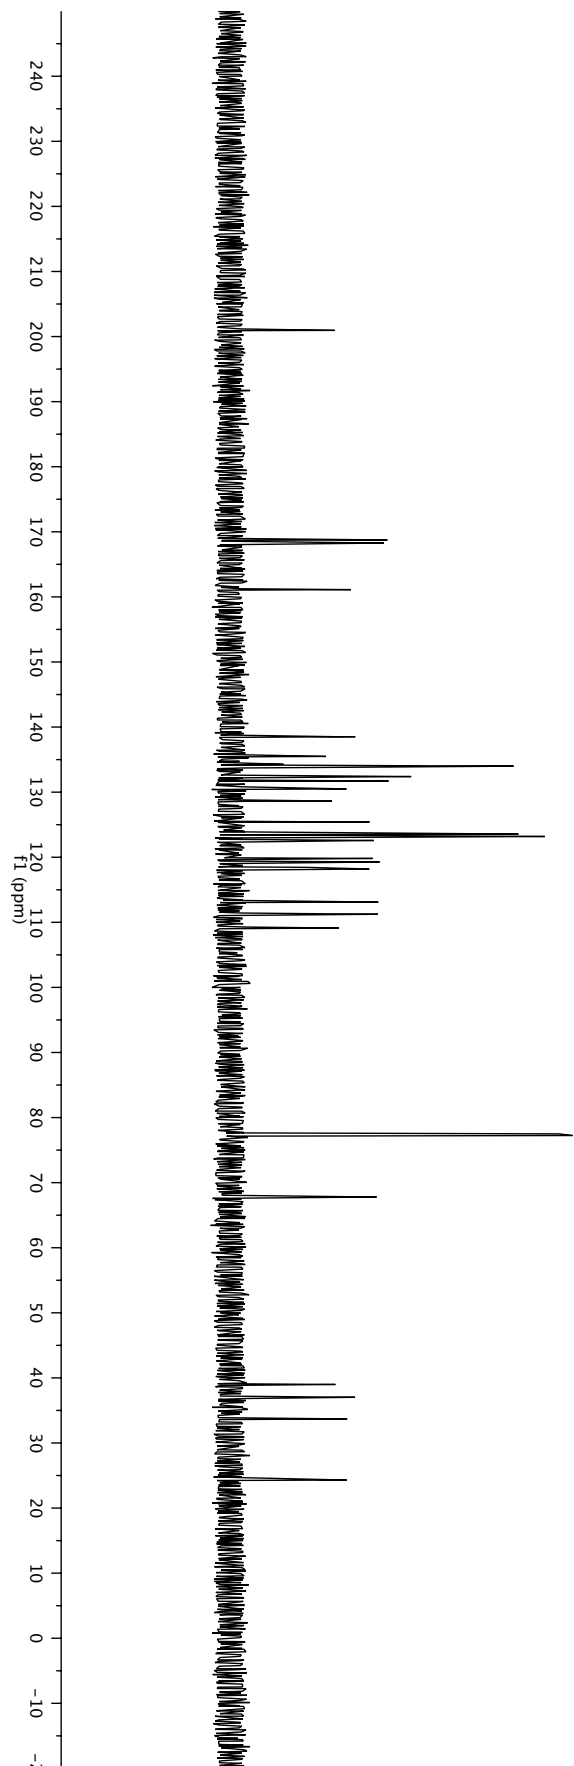



| Parameter              | Value          |
|------------------------|----------------|
| Origin                 | Varian         |
| Spectrometer           | inova          |
| Solvent                | CD3OD          |
| Temperature            | 30.0           |
| Pulse Sequence         | s2pul          |
| Experiment             | 1D             |
| Number of Scans        | 8              |
| Receiver Gain          | 34             |
| Relaxation Delay       | 0.1000         |
| Pulse Width            | 0.0000         |
| Spectrometer Frequency | 500.43         |
| Spectral Width         | 12012.0        |
| Lowest Frequency       | –512.8         |
| Nucleus                | <sup>1</sup> H |
| Acquired Size          | 60051          |
| Spectral Size          | 131072         |

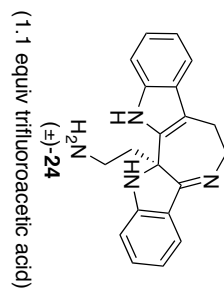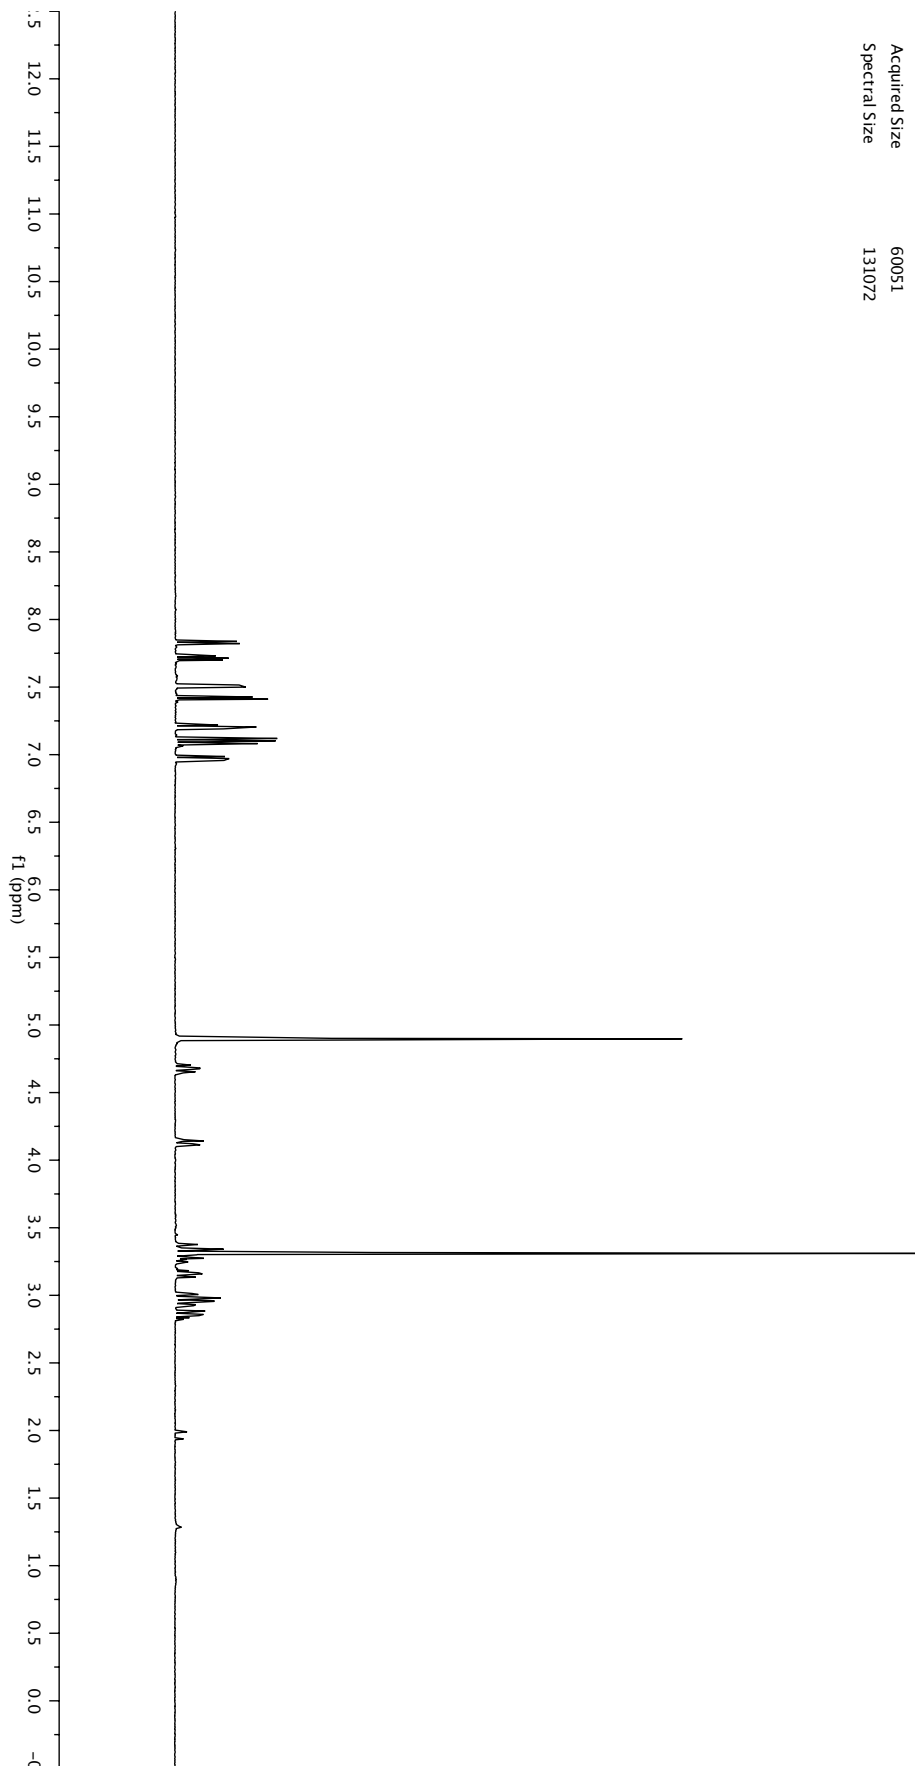

| Parameter              | Value           |
|------------------------|-----------------|
| Origin                 | Varian          |
| Spectrometer           | inova           |
| Solvent                | CD3OD           |
| Temperature            | 20.0            |
| Pulse Sequence         | s2pul           |
| Experiment             | 1D              |
| Number of Scans        | 9368            |
| Receiver Gain          | 60              |
| Relaxation Delay       | 0.7633          |
| Pulse Width            | 0.0000          |
| Spectrometer Frequency | 125.80          |
| Spectral Width         | 37735.8         |
| Lowest Frequency       | –6117.4         |
| Nucleus                | <sup>13</sup> C |
| Acquired Size          | 65505           |
| Spectral Size          | 131072          |

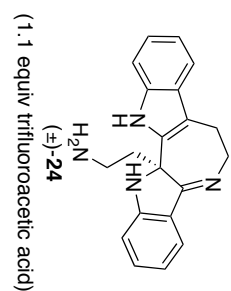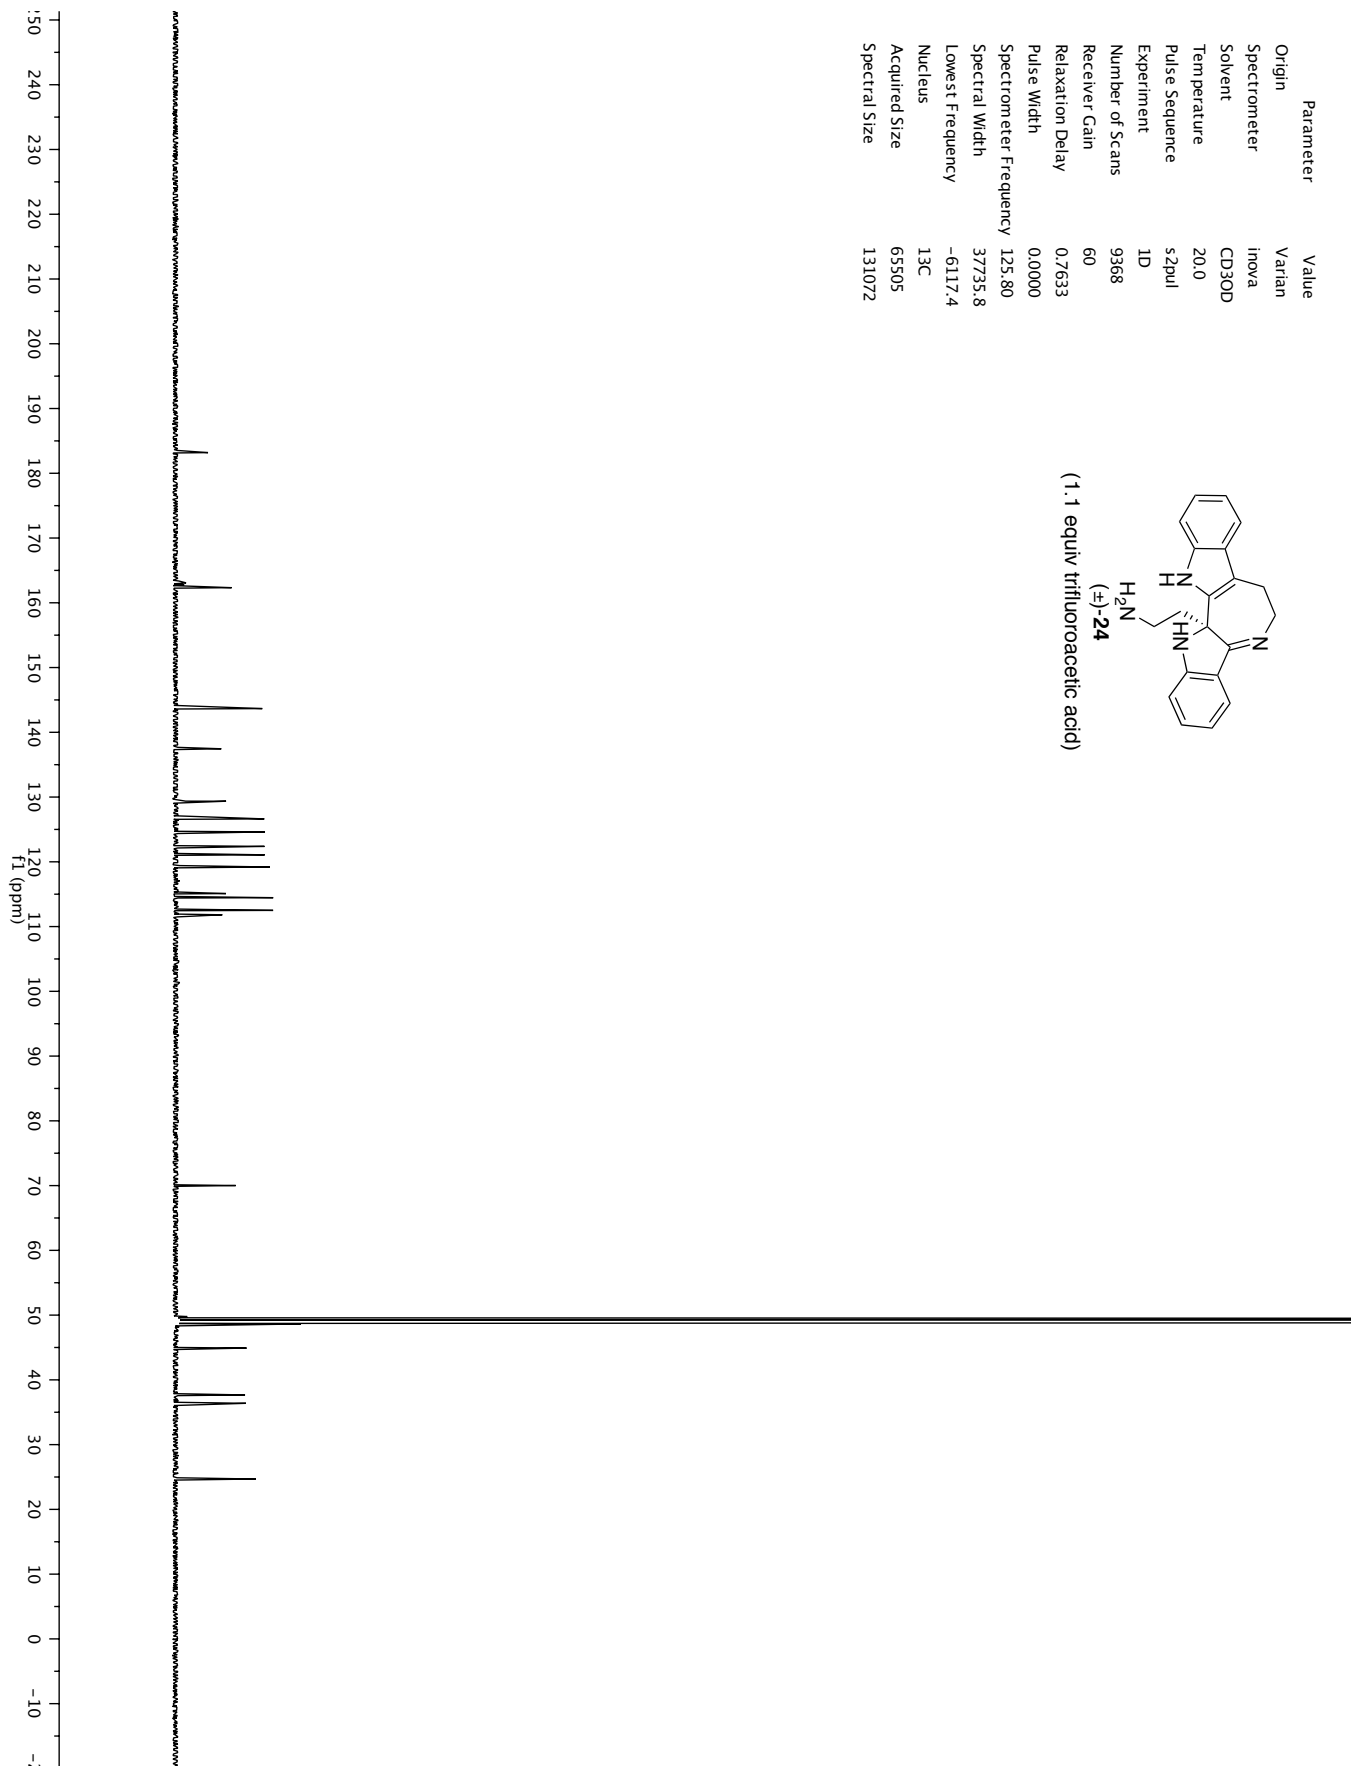

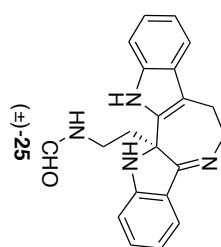

| Parameter              | Value          |
|------------------------|----------------|
| Origin                 | Varian         |
| Spectrometer           | inova          |
| Solvent                | CD3OD          |
| Temperature            | 30.0           |
| Pulse Sequence         | s2pul          |
| Experiment             | 1D             |
| Number of Scans        | 14             |
| Receiver Gain          | 34             |
| Relaxation Delay       | 0.1000         |
| Pulse Width            | 0.0000         |
| Spectrometer Frequency | 500.43         |
| Spectral Width         | 12012.0        |
| Lowest Frequency       | -512.5         |
| Nucleus                | <sup>1</sup> H |
| Acquired Size          | 60051          |
| Spectral Size          | 131072         |

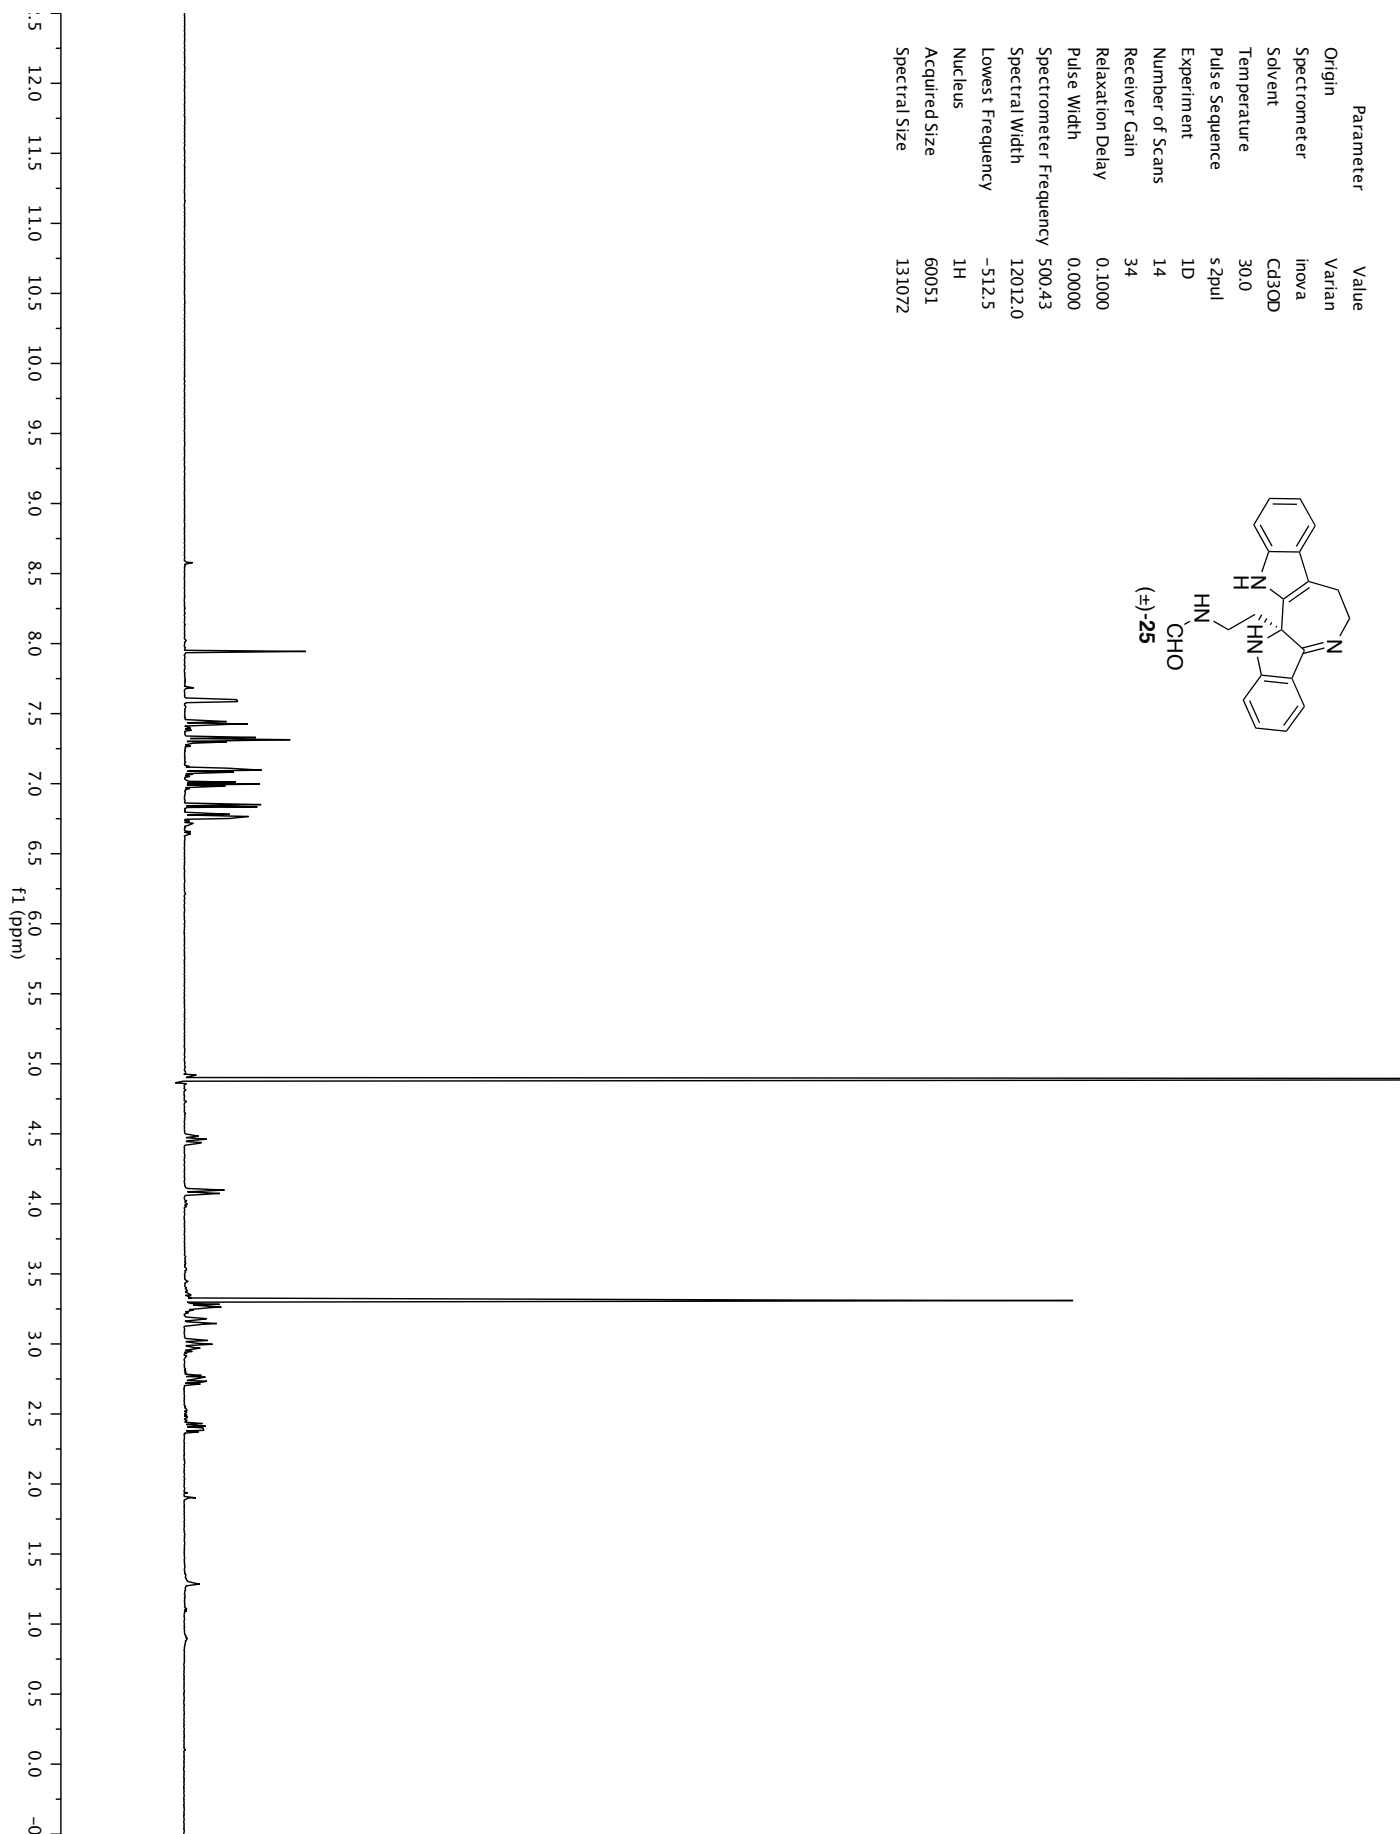

| Parameter              | Value           |
|------------------------|-----------------|
| Origin                 | Varian          |
| Spectrometer           | inova           |
| Solvent                | CD3OD           |
| Temperature            | 20.0            |
| Pulse Sequence         | s 2pul          |
| Experiment             | 1D              |
| Number of Scans        | 3728            |
| Receiver Gain          | 60              |
| Relaxation Delay       | 0.7633          |
| Pulse Width            | 0.0000          |
| Spectrometer Frequency | 125.80          |
| Spectral Width         | 37735.8         |
| Lowest Frequency       | –6116.8         |
| Nucleus                | <sup>13</sup> C |
| Acquired Size          | 65505           |
| Spectral Size          | 131072          |

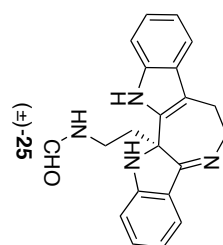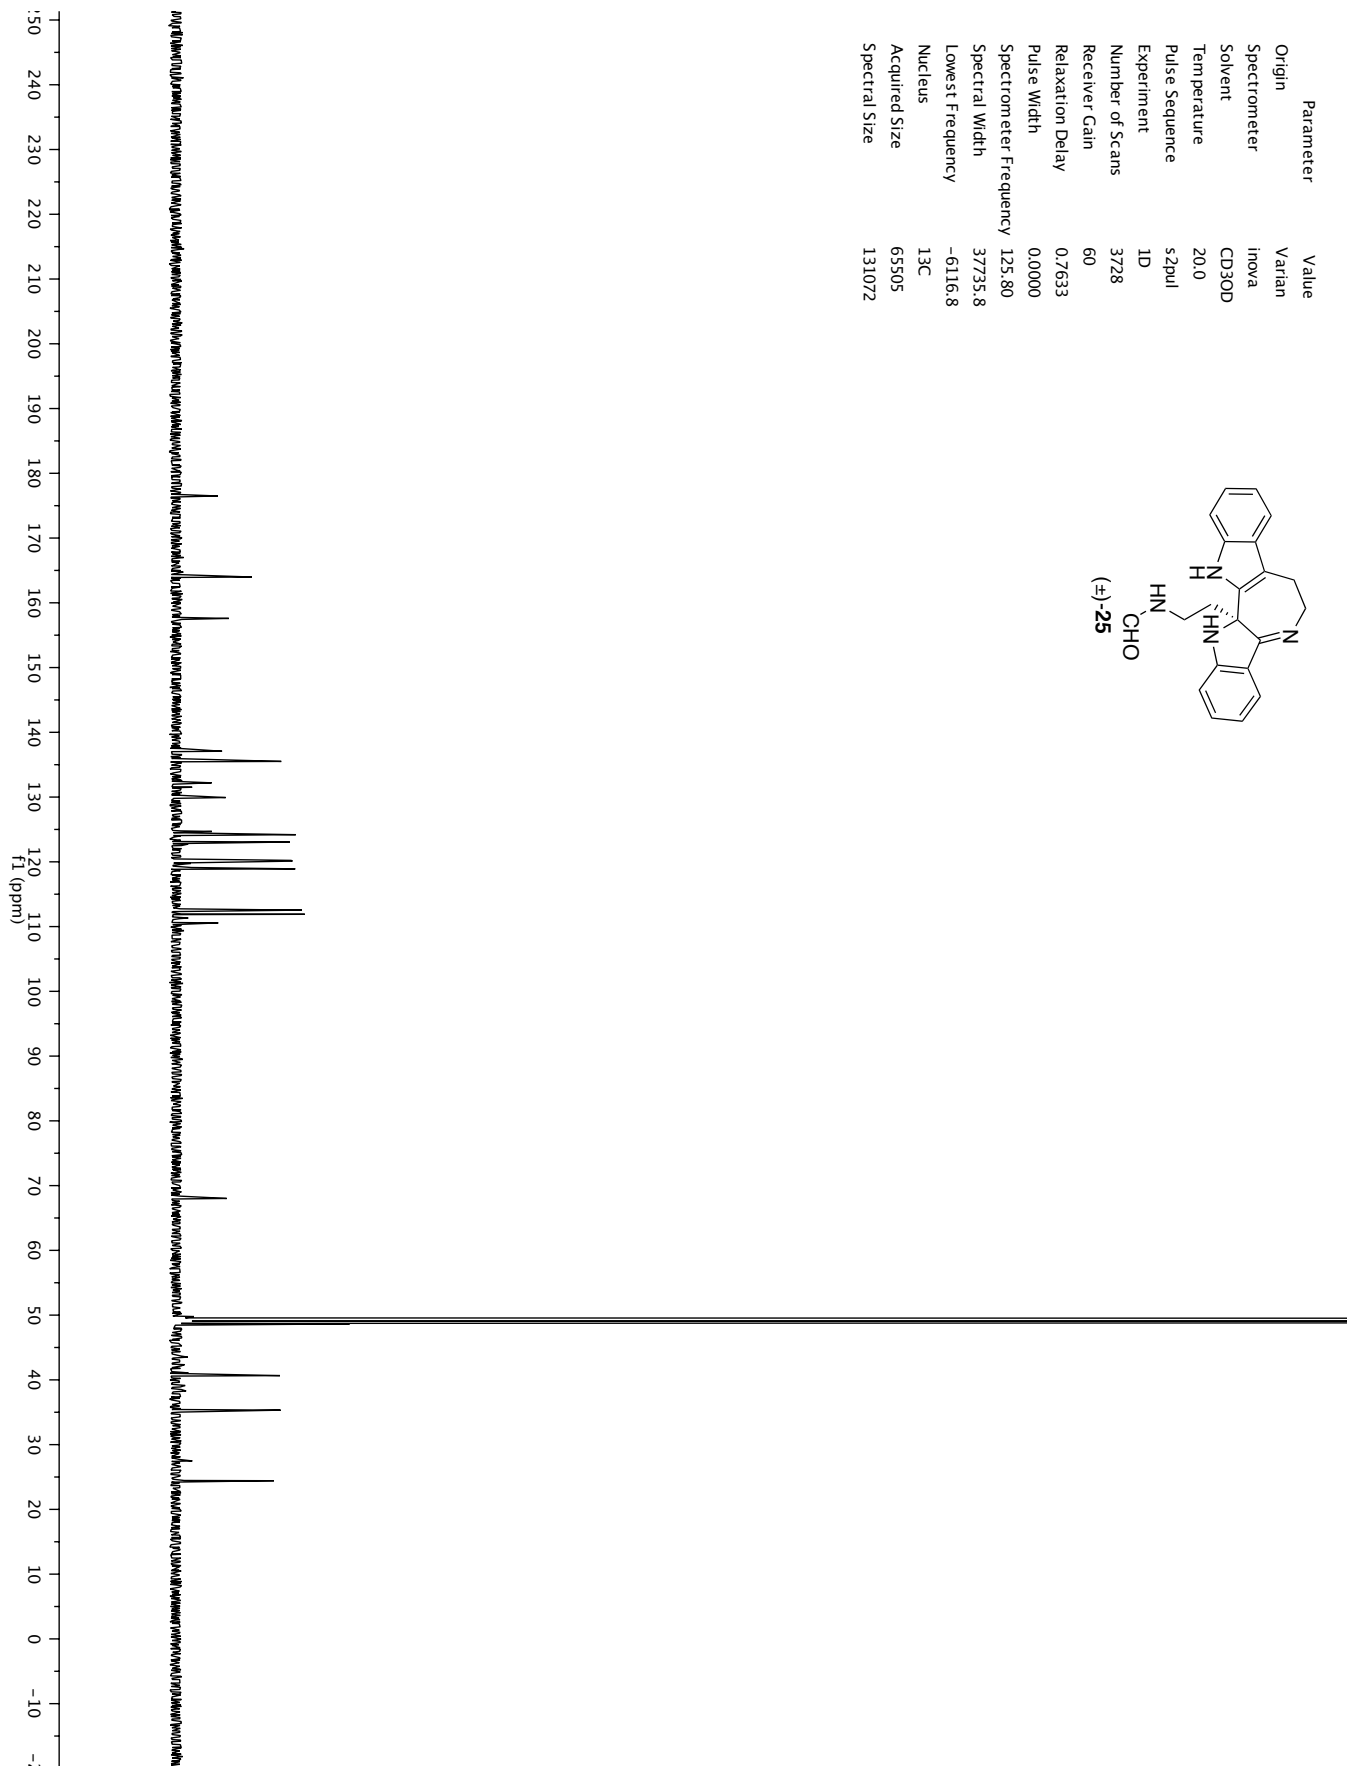

| Parameter              | Value          |
|------------------------|----------------|
| Origin                 | Varian         |
| Spectrometer           | inova          |
| Solvent                | CD3OD          |
| Temperature            | 20.0           |
| Pulse Sequence         | s2pul          |
| Experiment             | 1D             |
| Number of Scans        | 10             |
| Receiver Gain          | 32             |
| Relaxation Delay       | 0.1000         |
| Pulse Width            | 0.0000         |
| Spectrometer Frequency | 500.43         |
| Spectral Width         | 12012.0        |
| Lowest Frequency       | –518.1         |
| Nucleus                | <sup>1</sup> H |
| Acquired Size          | 60051          |
| Spectral Size          | 131072         |

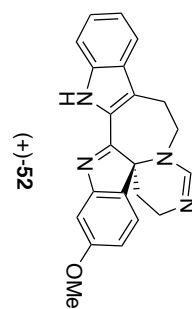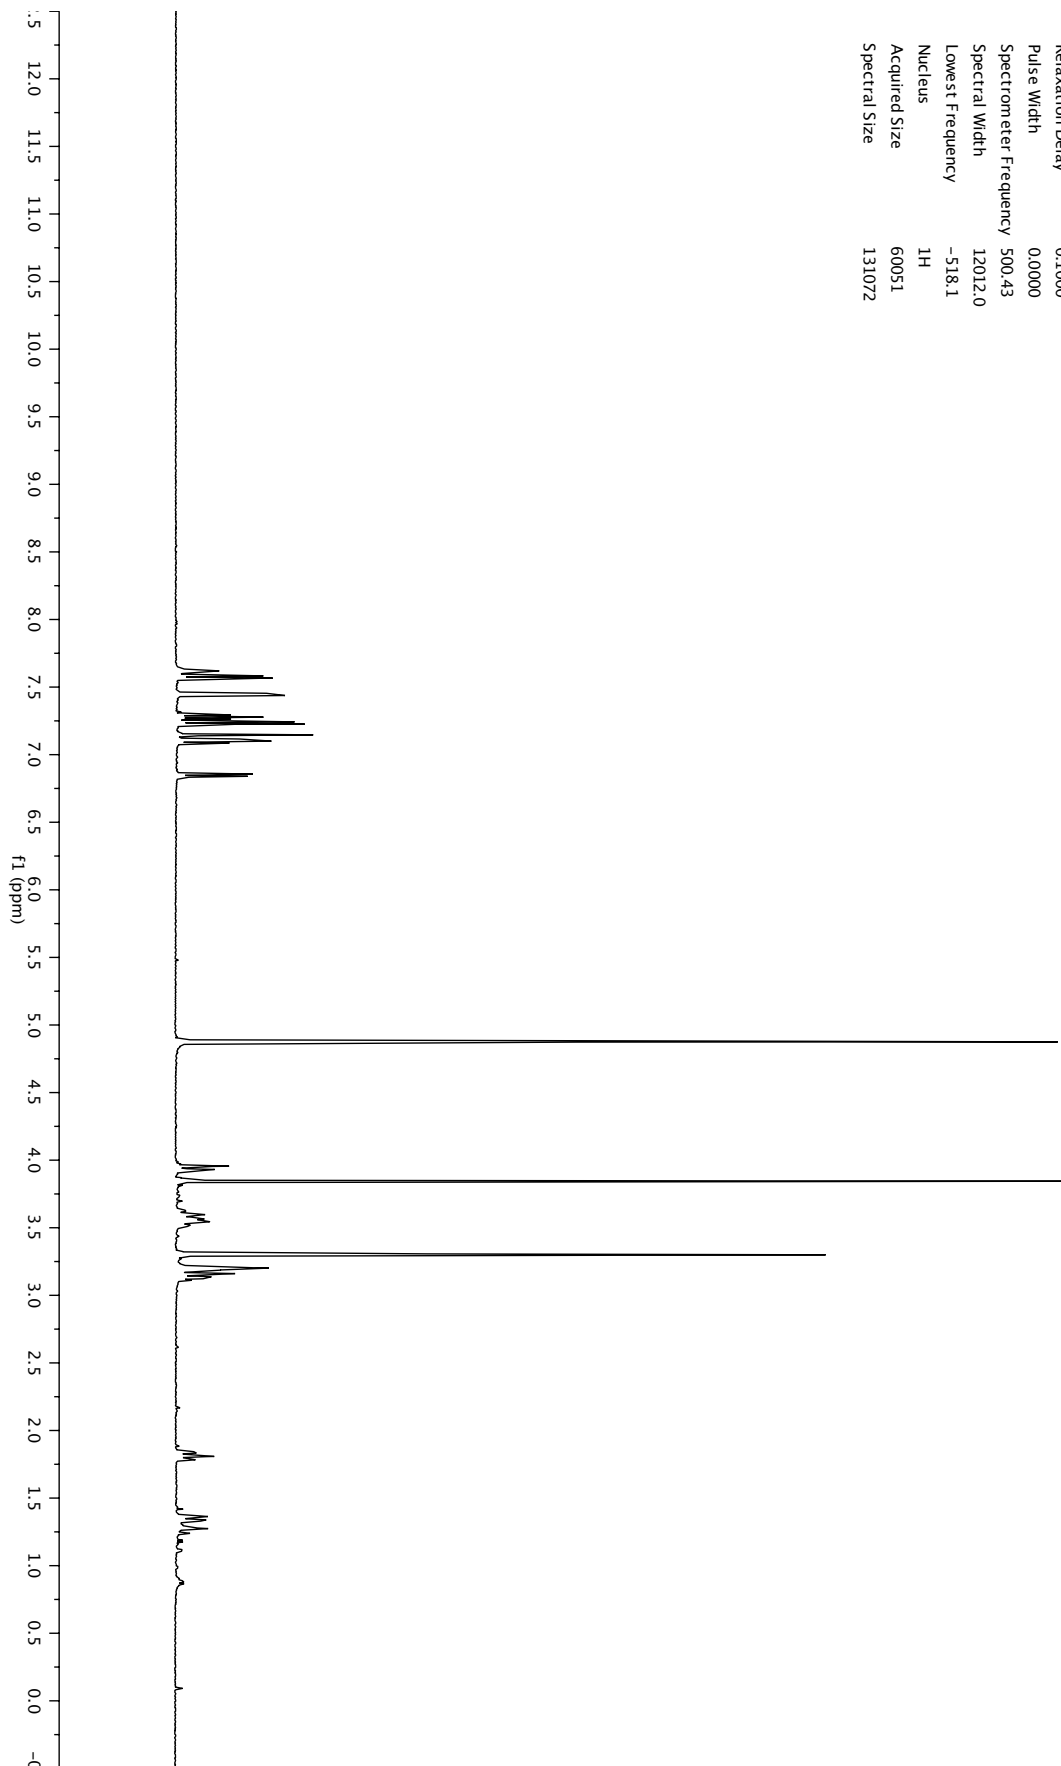

| Parameter              | Value           |
|------------------------|-----------------|
| Origin                 | Varian          |
| Spectrometer           | inova           |
| Solvent                | CD3OD           |
| Temperature            | 20.0            |
| Pulse Sequence         | s2pul           |
| Experiment             | 1D              |
| Number of Scans        | 1944            |
| Receiver Gain          | 60              |
| Relaxation Delay       | 0.7633          |
| Pulse Width            | 0.0000          |
| Spectrometer Frequency | 125.80          |
| Spectral Width         | 37735.8         |
| Lowest Frequency       | -6117.4         |
| Nucleus                | <sup>13</sup> C |
| Acquired Size          | 65505           |
| Spectral Size          | 131072          |

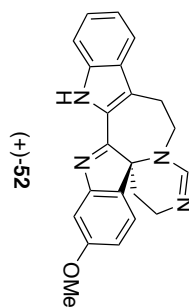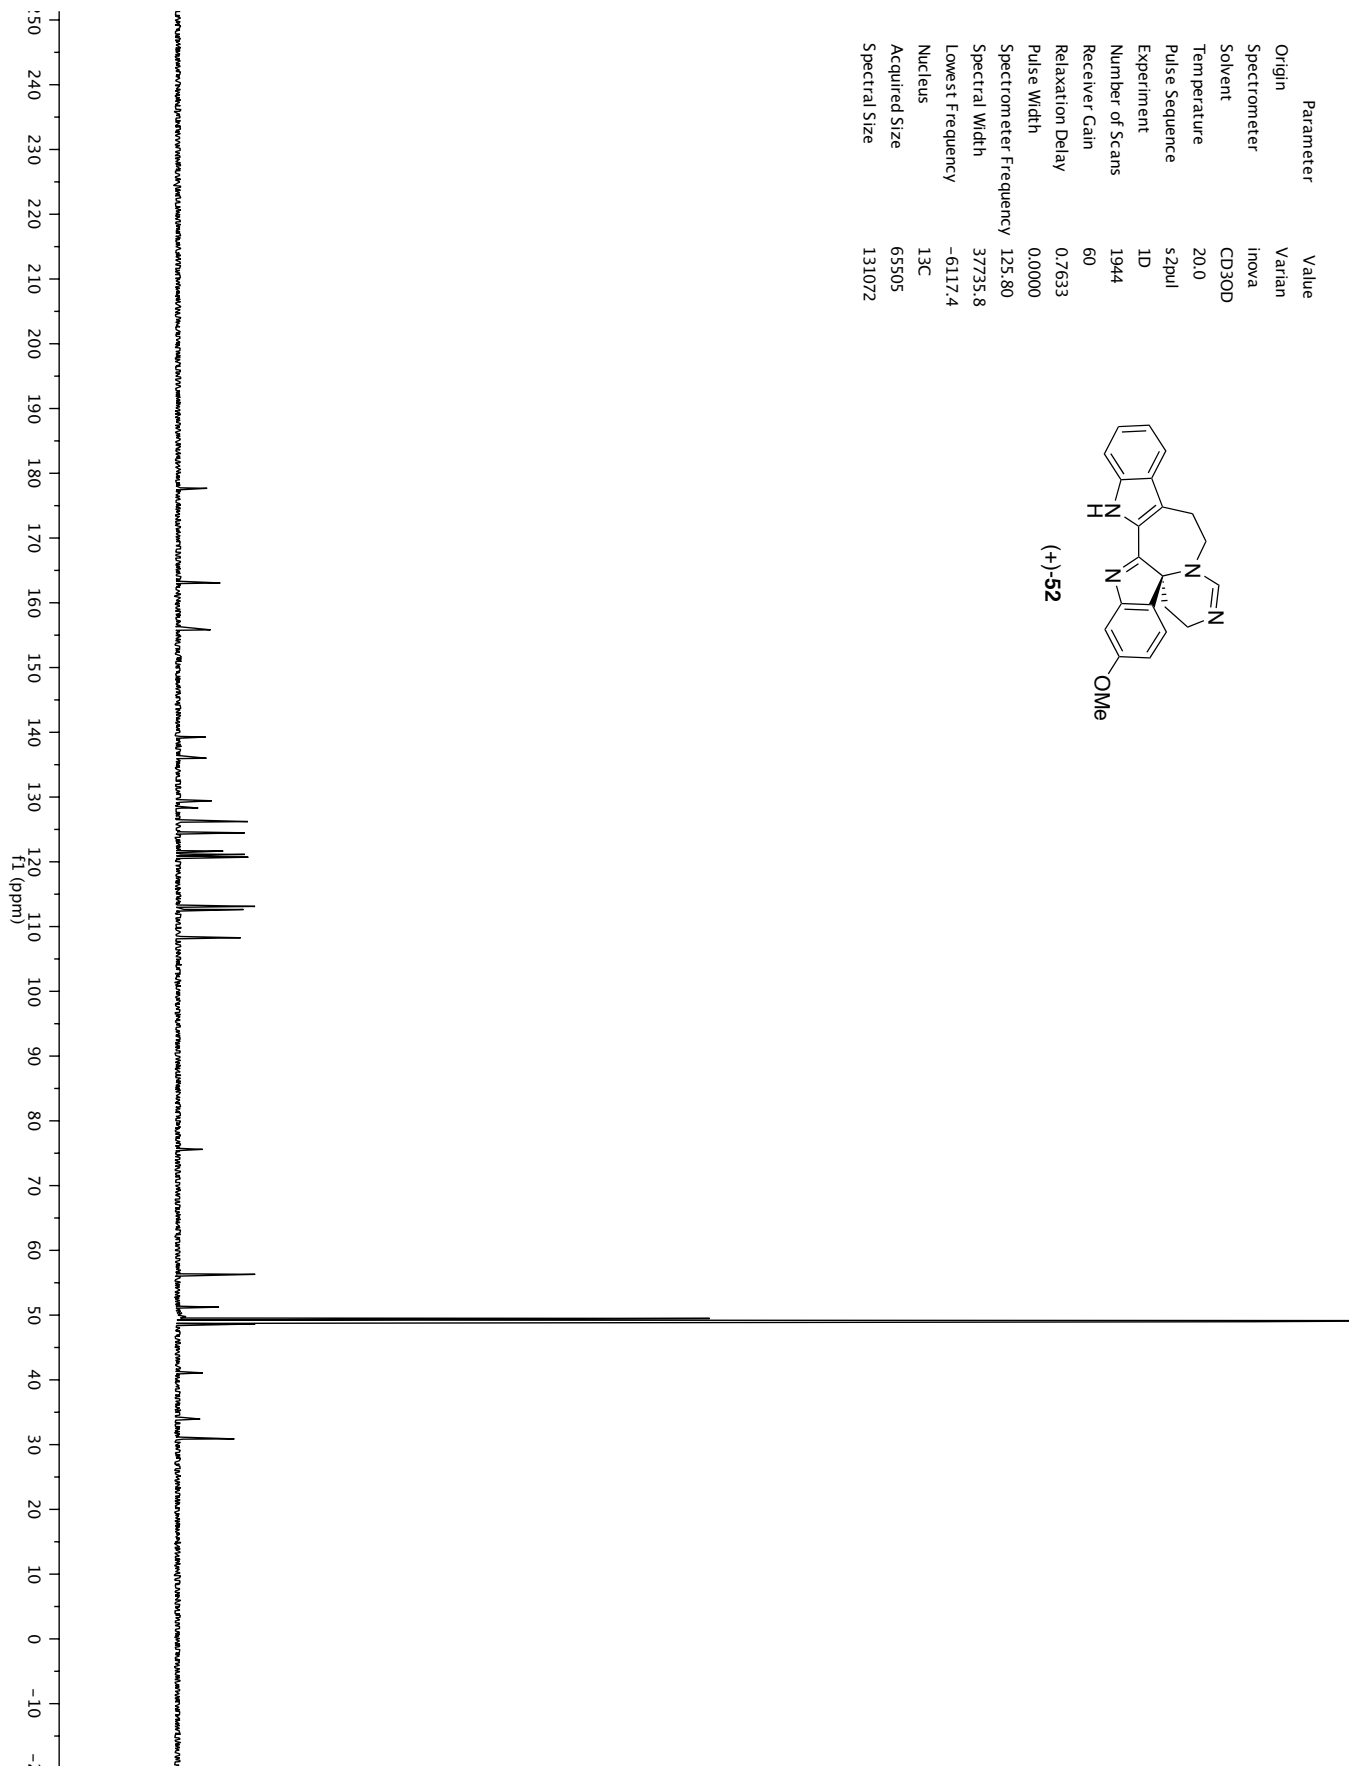

| Parameter              | Value             |
|------------------------|-------------------|
| Origin                 | Varian            |
| Spectrometer           | inova             |
| Solvent                | CDCl <sub>3</sub> |
| Temperature            | 30.0              |
| Pulse Sequence         | s2pul             |
| Experiment             | 1D                |
| Number of Scans        | 10                |
| Receiver Gain          | 32                |
| Relaxation Delay       | 0.1000            |
| Pulse Width            | 0.0000            |
| Spectrometer Frequency | 500.43            |
| Spectral Width         | 12012.0           |
| Lowest Frequency       | –524.7            |
| Nucleus                | <sup>1</sup> H    |
| Acquired Size          | 60051             |
| Spectral Size          | 131072            |

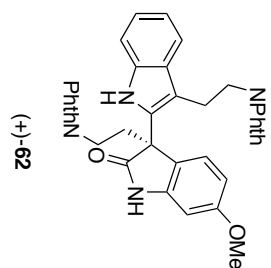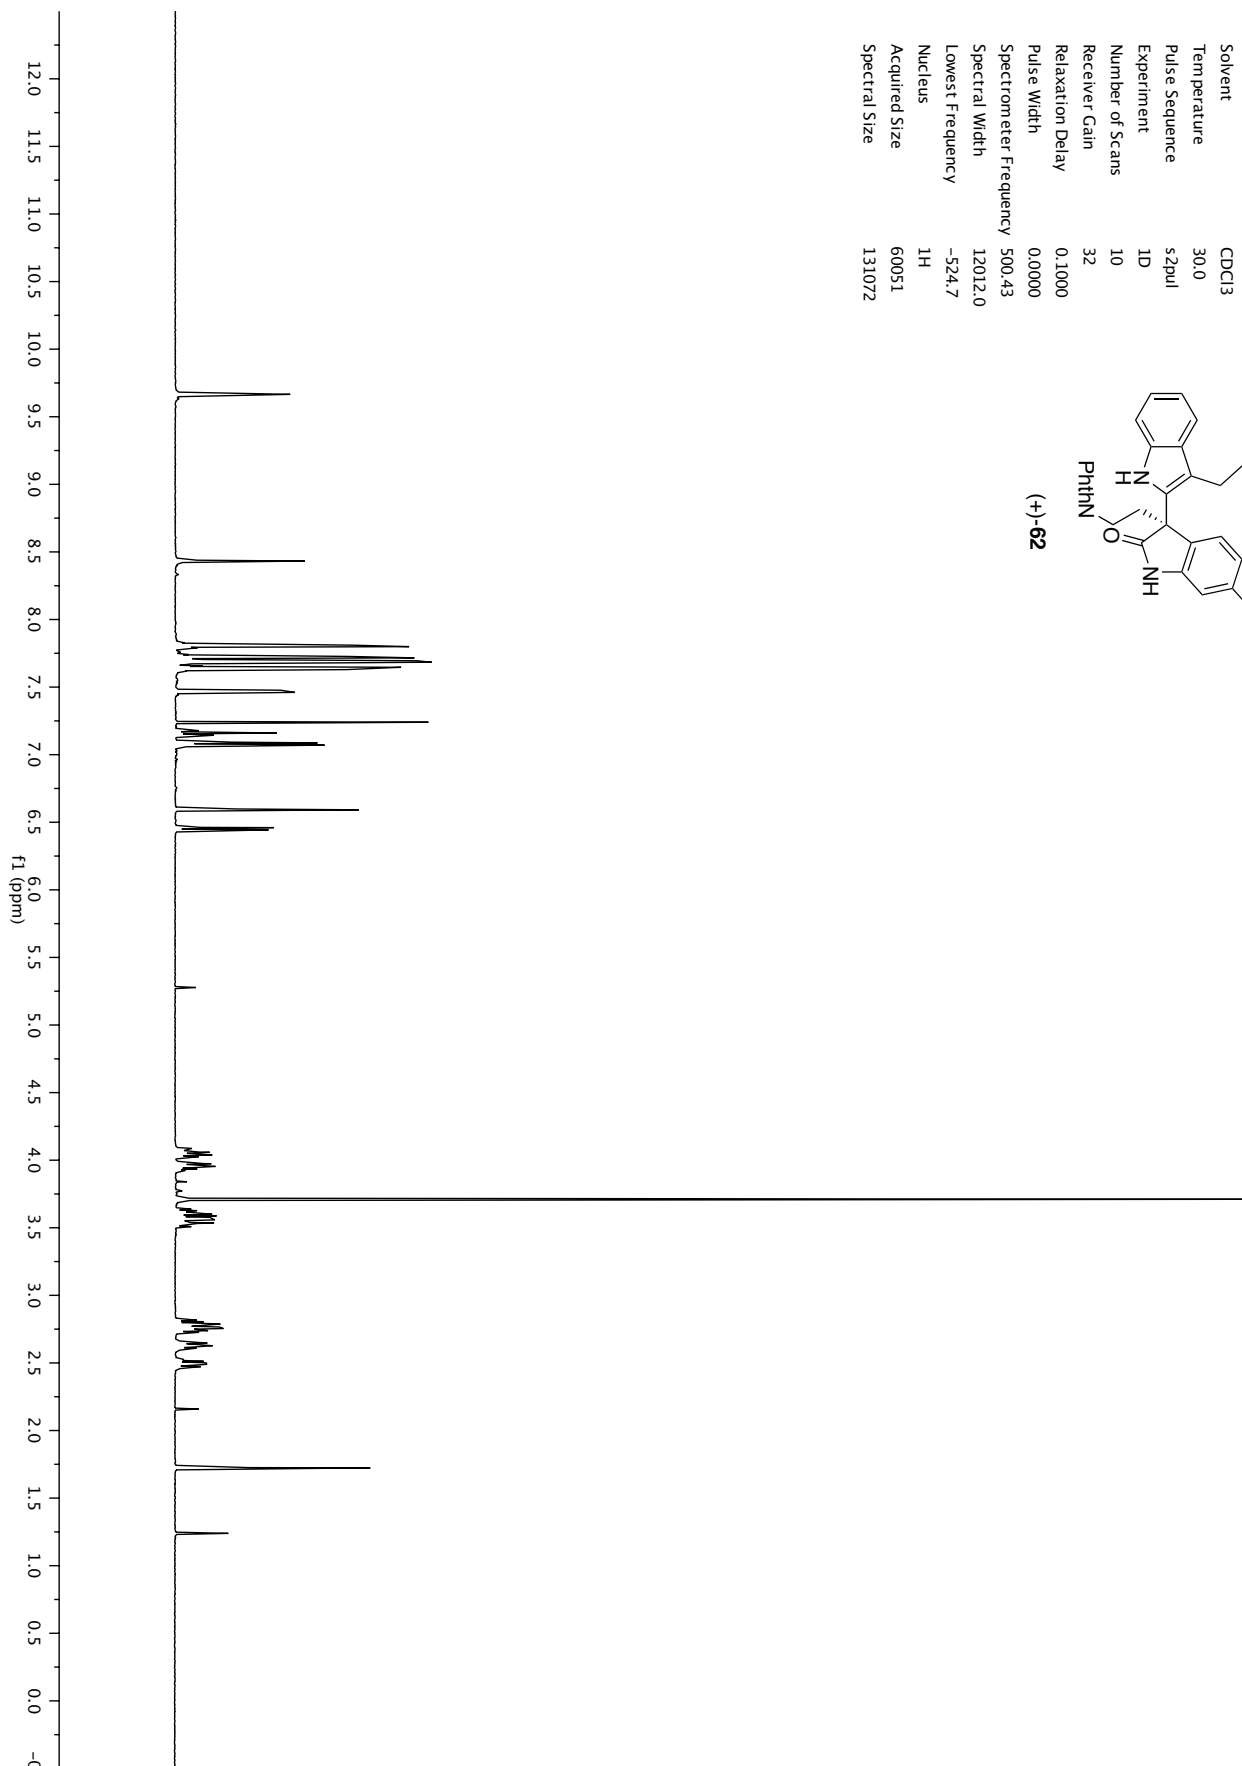

| Parameter              | Value             |
|------------------------|-------------------|
| Origin                 | Varian            |
| Spectrometer           | inova             |
| Solvent                | CDCl <sub>3</sub> |
| Temperature            | 20.0              |
| Pulse Sequence         | s 2pul            |
| Experiment             | 1D                |
| Number of Scans        | 186               |
| Receiver Gain          | 60                |
| Relaxation Delay       | 0.7633            |
| Pulse Width            | 0.0000            |
| Spectrometer Frequency | 125.79            |
| Spectral Width         | 37735.8           |
| Lowest Frequency       | –6288.0           |
| Nucleus                | <sup>13</sup> C   |
| Acquired Size          | 65505             |
| Spectral Size          | 131072            |

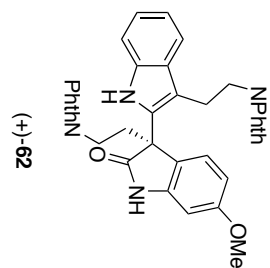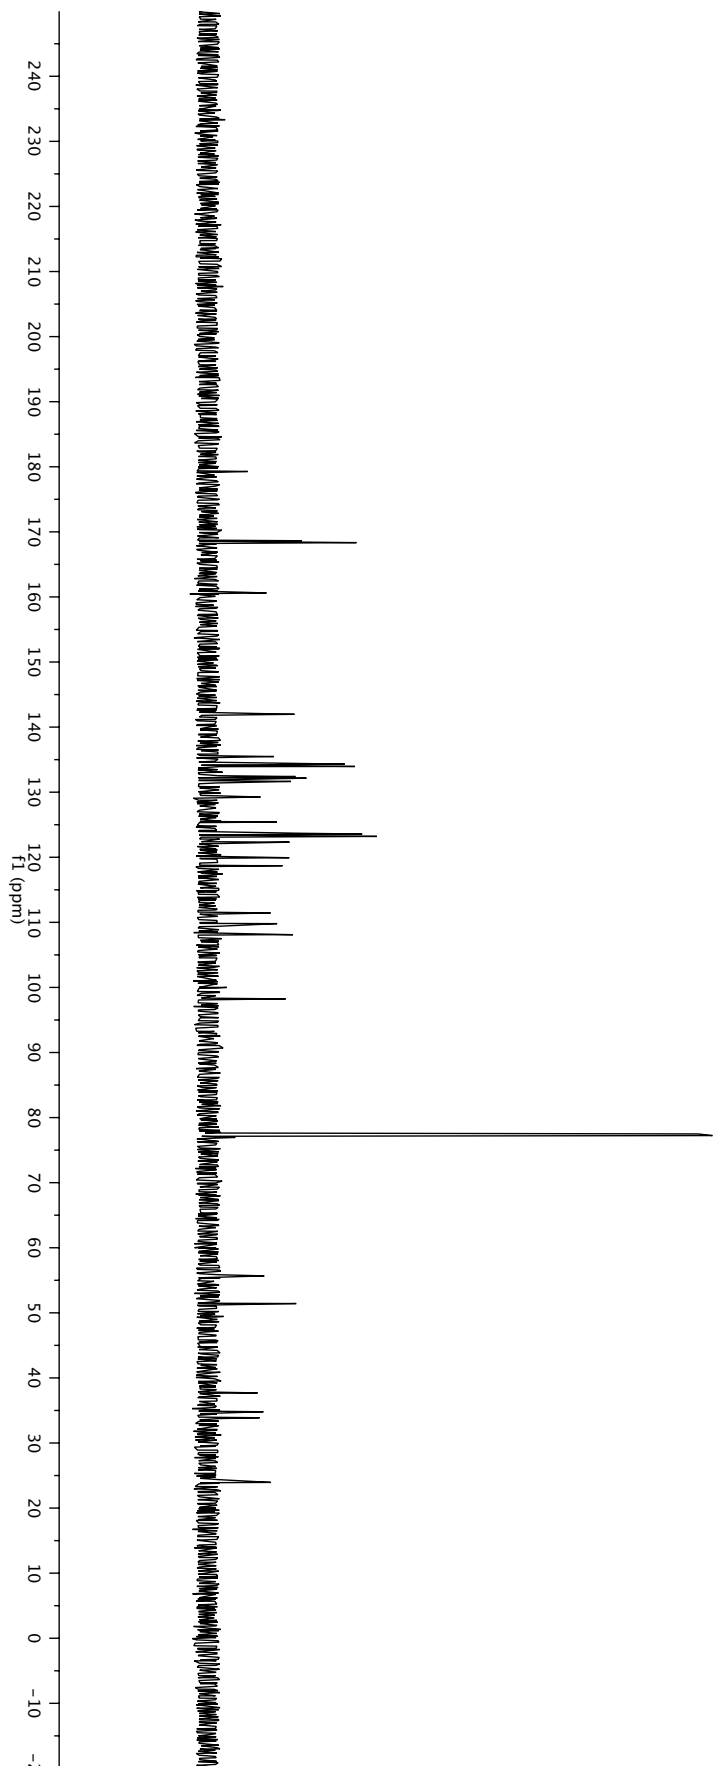



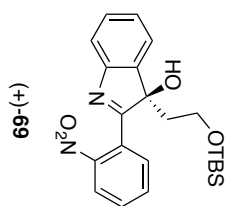

| Parameter              | Value             |
|------------------------|-------------------|
| Origin                 | Varian            |
| Spectrometer           | inova             |
| Solvent                | CDCl <sub>3</sub> |
| Temperature            | 30.0              |
| Pulse Sequence         | s 2pul            |
| Experiment             | 1D                |
| Number of Scans        | 14                |
| Receiver Gain          | 22                |
| Relaxation Delay       | 0.1000            |
| Pulse Width            | 0.0000            |
| Spectrometer Frequency | 500.43            |
| Spectral Width         | 12012.0           |
| Lowest Frequency       | -525.9            |
| Nucleus                | <sup>1</sup> H    |
| Acquired Size          | 60051             |
| Spectral Size          | 131072            |

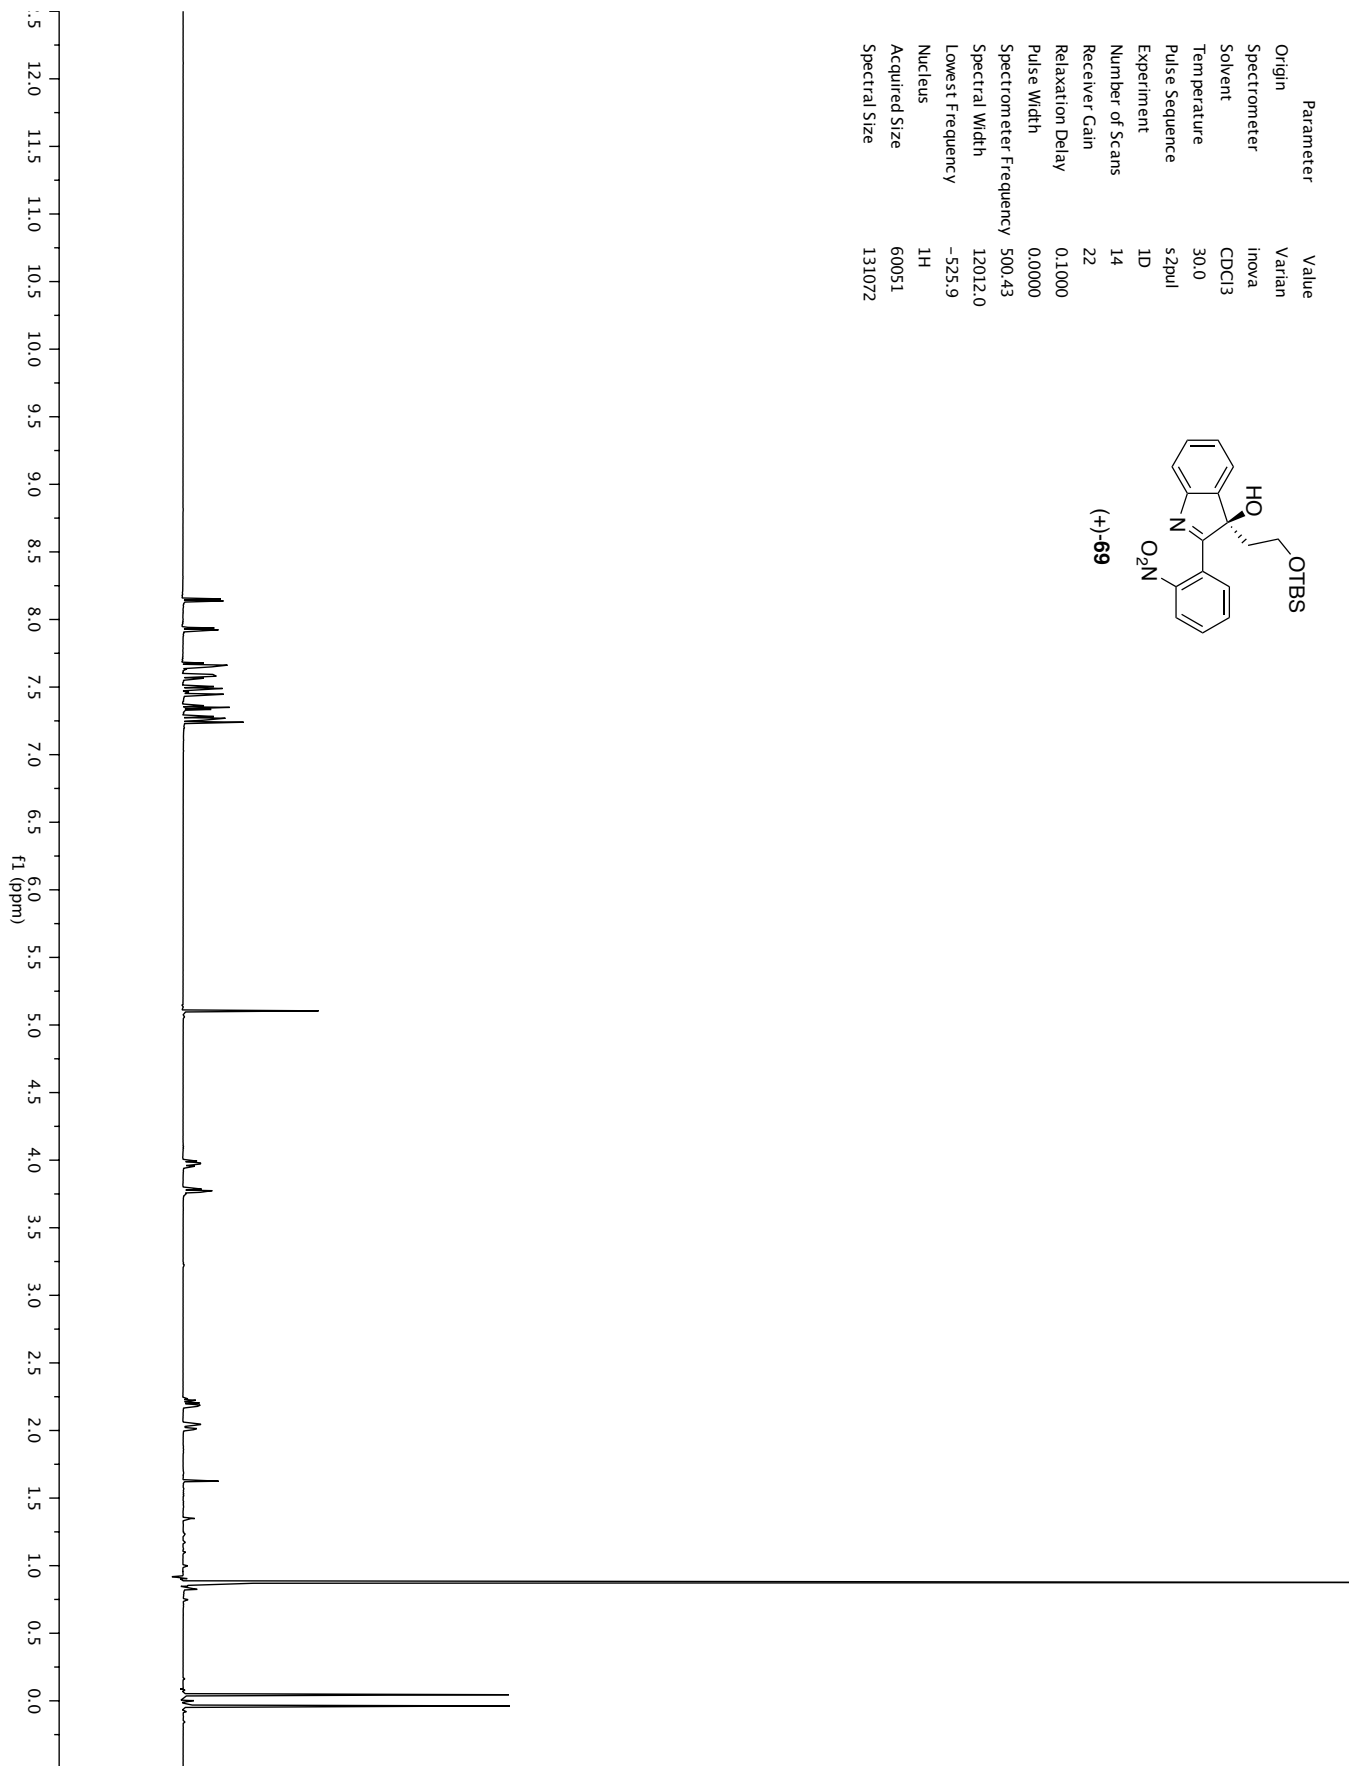

| Parameter              | Value             |
|------------------------|-------------------|
| Origin                 | Varian            |
| Spectrometer           | inova             |
| Solvent                | CDCl <sub>3</sub> |
| Temperature            | 30.0              |
| Pulse Sequence         | s2pul             |
| Experiment             | 1D                |
| Number of Scans        | 112               |
| Receiver Gain          | 60                |
| Relaxation Delay       | 0.7633            |
| Pulse Width            | 0.0000            |
| Spectrometer Frequency | 125.79            |
| Spectral Width         | 37735.8           |
| Lowest Frequency       | –6289.2           |
| Nucleus                | <sup>13</sup> C   |
| Acquired Size          | 65505             |
| Spectral Size          | 131072            |

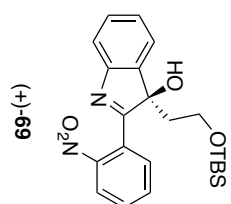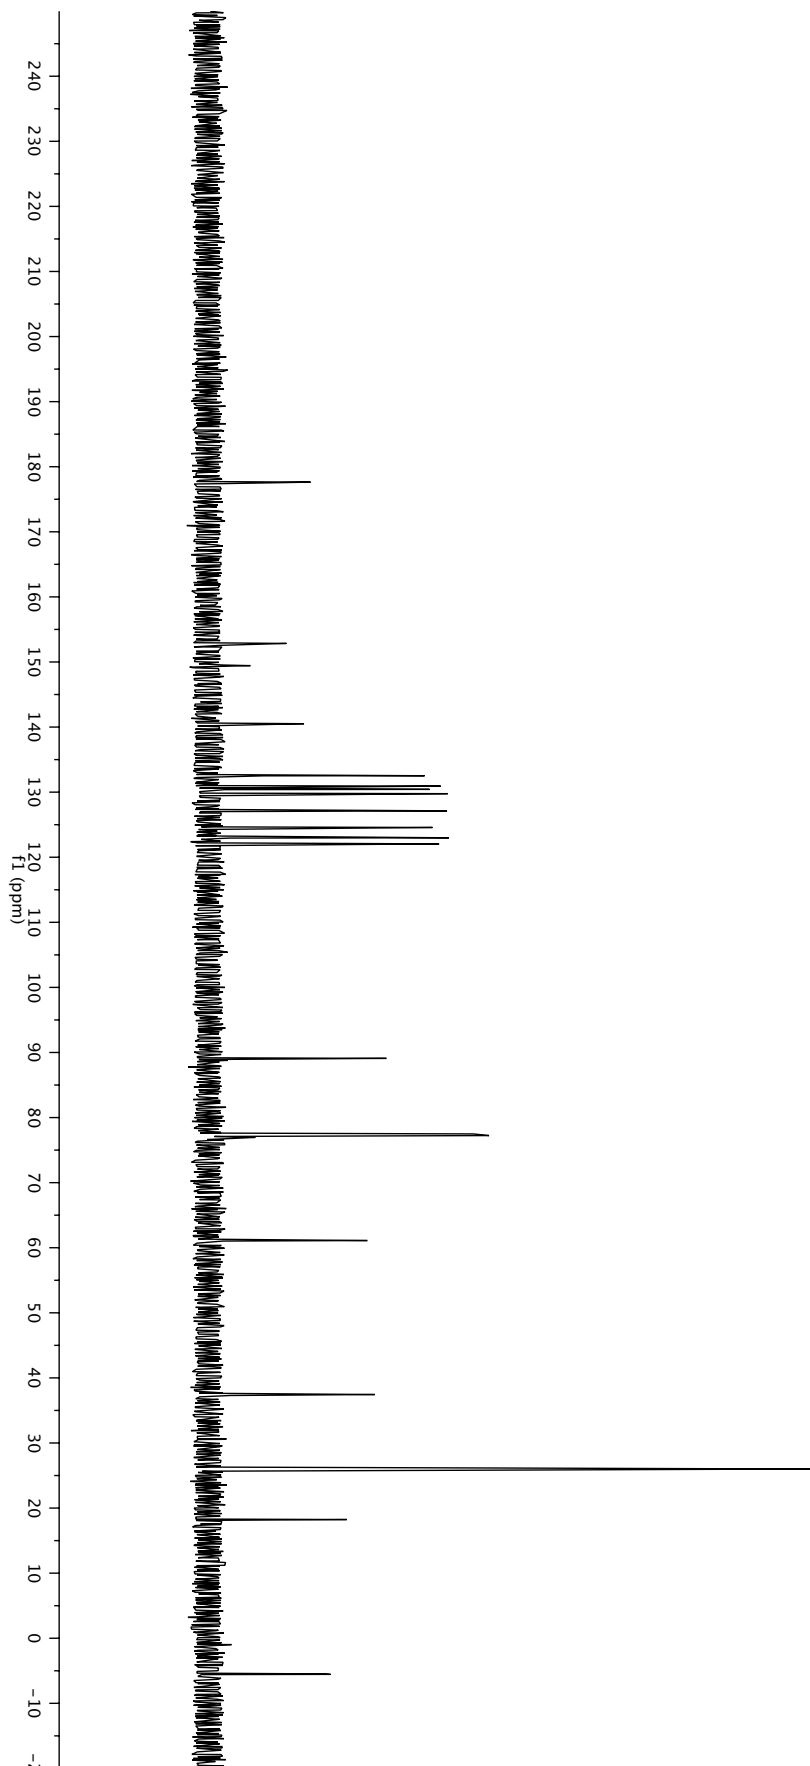

```

Injection Date   :                               Seq. Line :    3
Sample Name     :                               Location  : Vial 91
Acq. Operator   : SH                               Inj         :    1
                                                    Inj Volume  : 0 µl
Different Inj Volume from Sequence !      Actual Inj Volume : 5 µl
Acq. Method     :
Last changed    :
Analysis Method :
Last changed    :

```

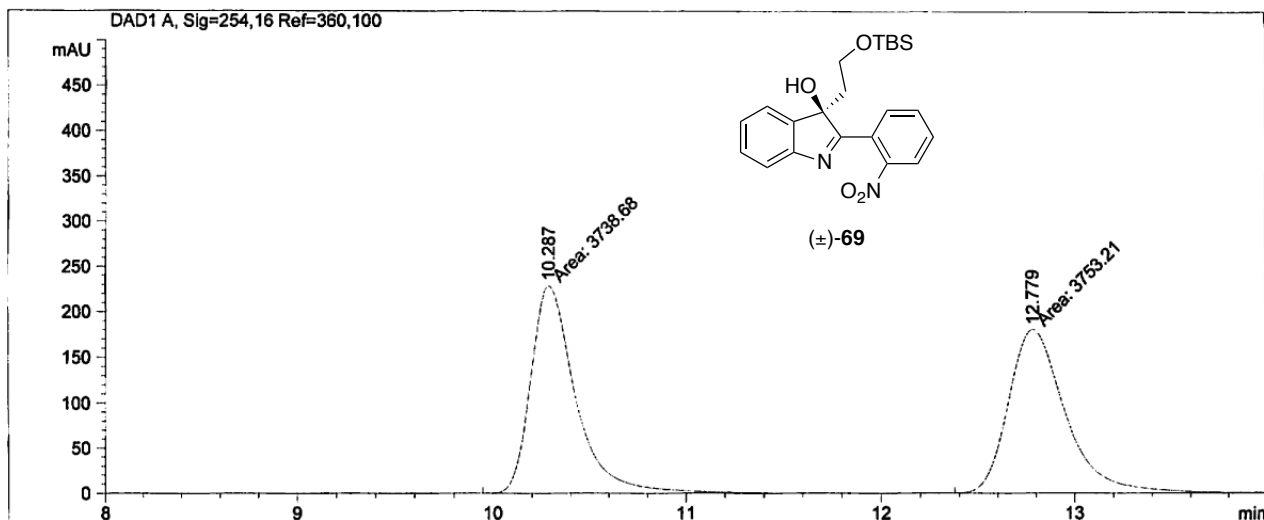

```
Sorted By      :      Signal
Multiplier    :      1.0000
Dilution      :      1.0000
Use Multiplier & Dilution Factor with ISTDs
```

| Peak # | RetTime [min] | Type | Width [min] | Area [mAU*s] | Height [mAU] | Area %  |
|--------|---------------|------|-------------|--------------|--------------|---------|
| 1      | 10.287        | MM   | 0.2718      | 3738.68066   | 229.28889    | 49.9031 |
| 2      | 12.779        | MM   | 0.3450      | 3753.20703   | 181.29138    | 50.0969 |

Results obtained with enhanced integrator!

Signal 1: DAD1 A, Sig=254,16 Ref=360,100

Signal 1: DAD1 A, Sig=254,16 Ref=360,100

chiralpak IC 80:20=Hx:IPA 0.5 mL/min

```
=====
Injection Date   :                               Seq. Line :    1
Sample Name     :                               Location  : Vial 91
Acq. Operator   : SH                           Inj         :    1
                                           Inj Volume  : 0 µl
Different Inj Volume from Sequence !   Actual Inj Volume : 5 µl
Acq. Method     :
Last changed    :
Analysis Method :
Last changed    :
=====
```

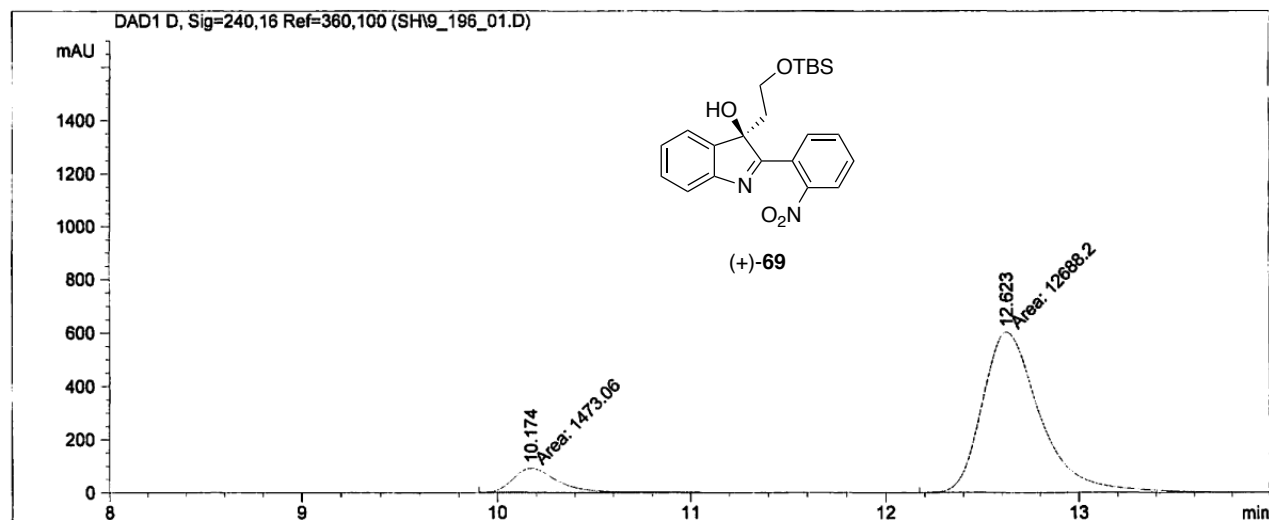

Area Percent Report

```
Sorted By      : Signal
Multiplier     : 1.0000
Dilution       : 1.0000
Use Multiplier & Dilution Factor with ISTDs
```

Signal 1: DAD1 D, Sig=240,16 Ref=360,100

| Peak # | RetTime [min] | Type | Width [min] | Area [mAU*s] | Height [mAU] | Area %  |
|--------|---------------|------|-------------|--------------|--------------|---------|
| 1      | 10.174        | MM   | 0.2661      | 1473.06104   | 92.25103     | 10.4020 |
| 2      | 12.623        | MM   | 0.3503      | 1.26882e4    | 603.61407    | 89.5980 |

Totals : 1.41613e4 695.86510

Results obtained with enhanced integrator!

Summed Peaks Report

Signal 1: DAD1 D, Sig=240,16 Ref=360,100

Final Summed Peaks Report

Signal 1: DAD1 D, Sig=240,16 Ref=360,100

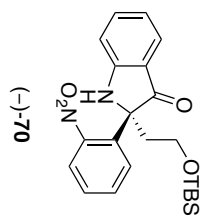

| Parameter              | Value             |
|------------------------|-------------------|
| Origin                 | Varian            |
| Spectrometer           | inova             |
| Solvent                | CDCl <sub>3</sub> |
| Temperature            | 30.0              |
| Pulse Sequence         | s 2pul            |
| Experiment             | 1D                |
| Number of Scans        | 32                |
| Receiver Gain          | 32                |
| Relaxation Delay       | 0.1000            |
| Pulse Width            | 0.0000            |
| Spectrometer Frequency | 500.43            |
| Spectral Width         | 12012.0           |
| Lowest Frequency       | –525.8            |
| Nucleus                | <sup>1</sup> H    |
| Acquired Size          | 60051             |
| Spectral Size          | 131072            |

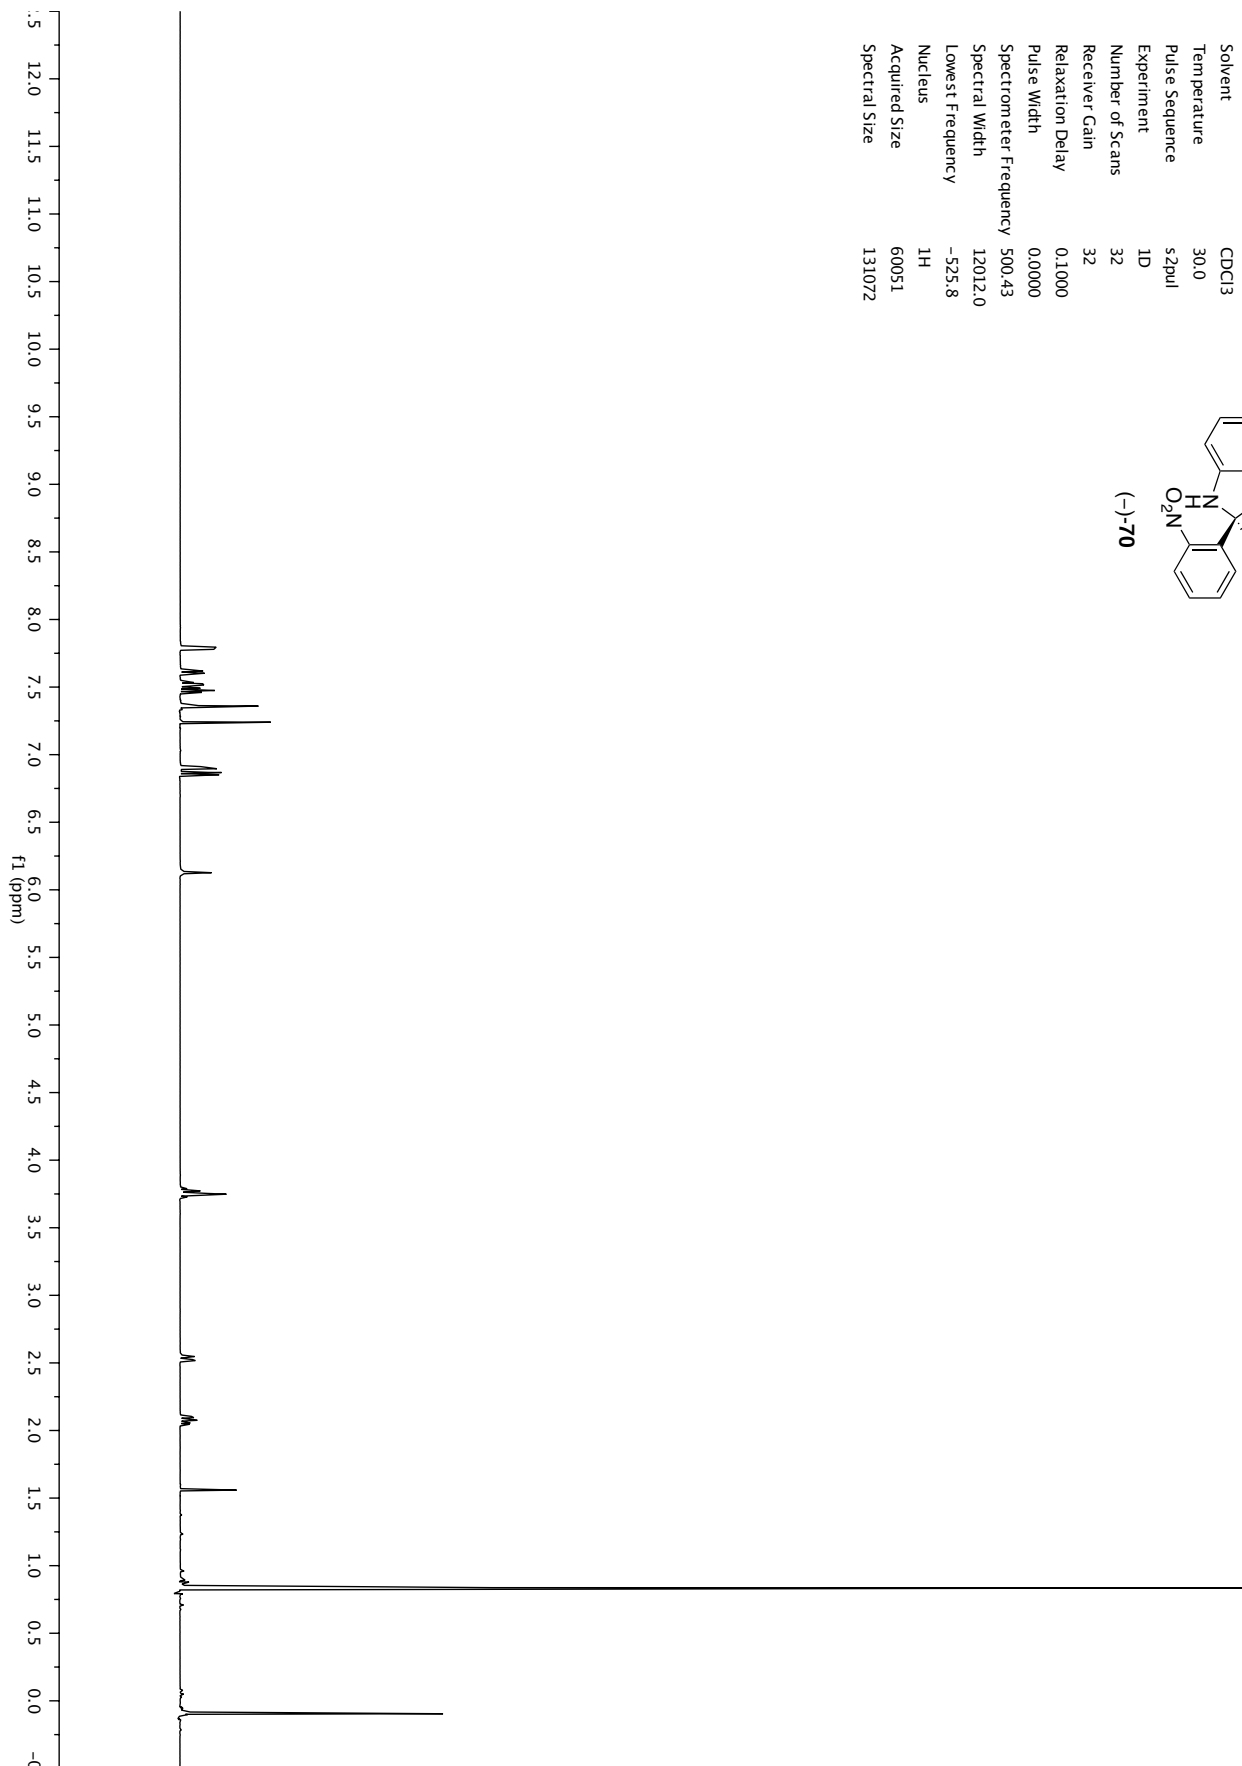

| Parameter              | Value             |
|------------------------|-------------------|
| Origin                 | Varian            |
| Spectrometer           | inova             |
| Solvent                | CDCl <sub>3</sub> |
| Temperature            | 30.0              |
| Pulse Sequence         | s 2pul            |
| Experiment             | 1D                |
| Number of Scans        | 986               |
| Receiver Gain          | 60                |
| Relaxation Delay       | 0.7633            |
| Pulse Width            | 0.0000            |
| Spectrometer Frequency | 125.79            |
| Spectral Width         | 37735.8           |
| Lowest Frequency       | –6288.1           |
| Nucleus                | <sup>13</sup> C   |
| Acquired Size          | 65505             |
| Spectral Size          | 131072            |

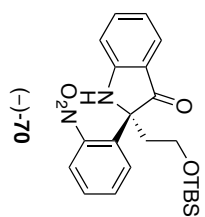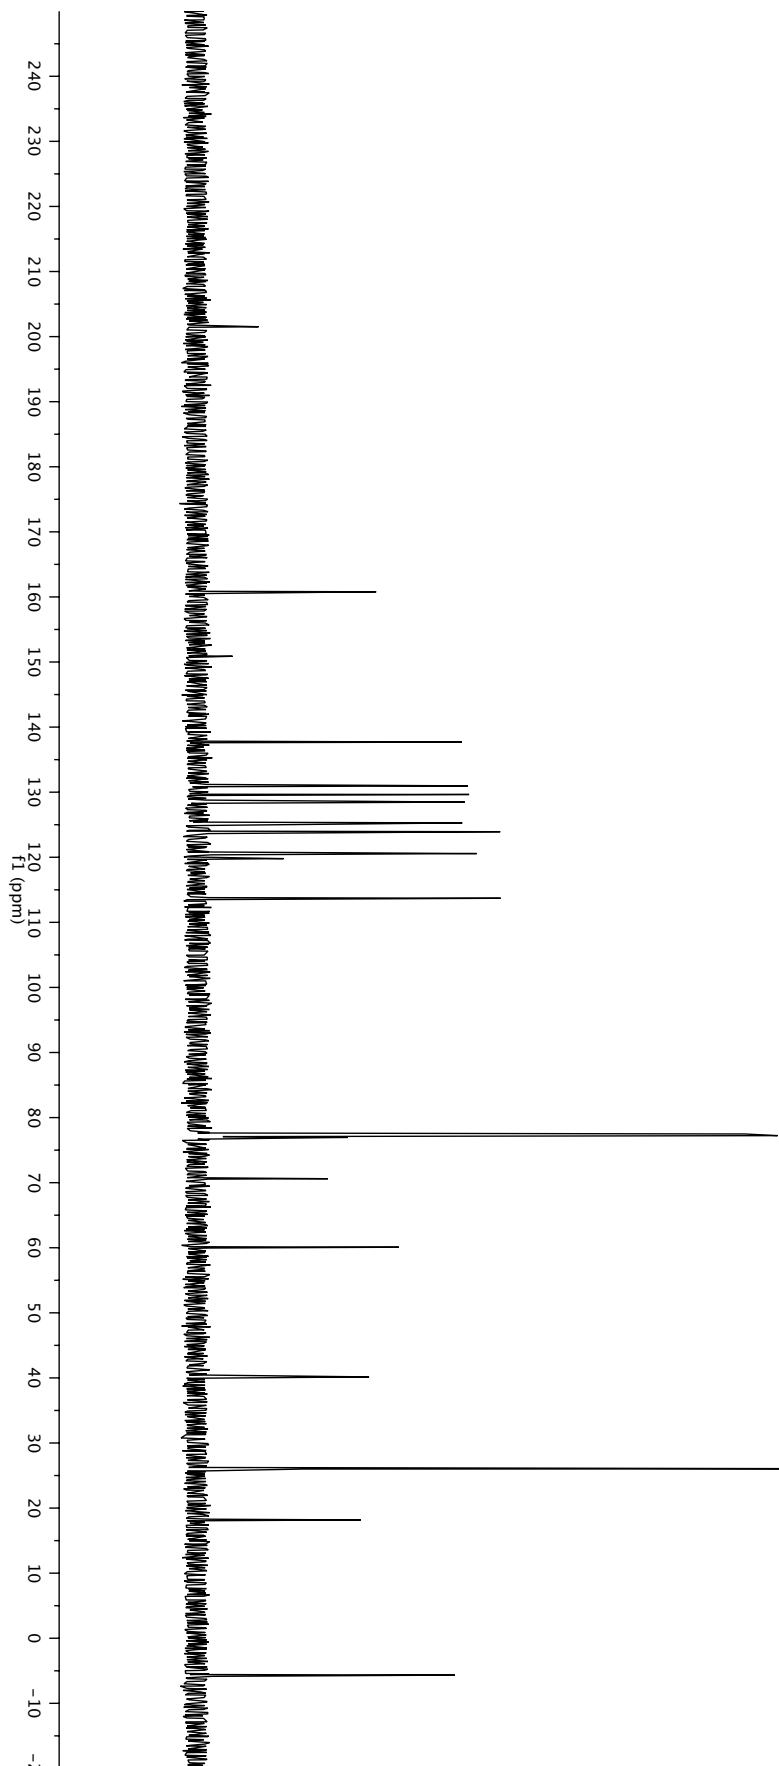

chiralpak IC 80:20=Hx:IPA 0.5 mL/min

```
=====
Injection Date   :                               Seq. Line :    1
Sample Name     :                               Location  : Vial 91
Acq. Operator   : SH                           Inj         :    1
                                                Inj Volume  : 0 µl
Different Inj Volume from Sequence !      Actual Inj Volume : 5 µl
Acq. Method     :
Last changed    :

Analysis Method :
Last changed    :
=====
```

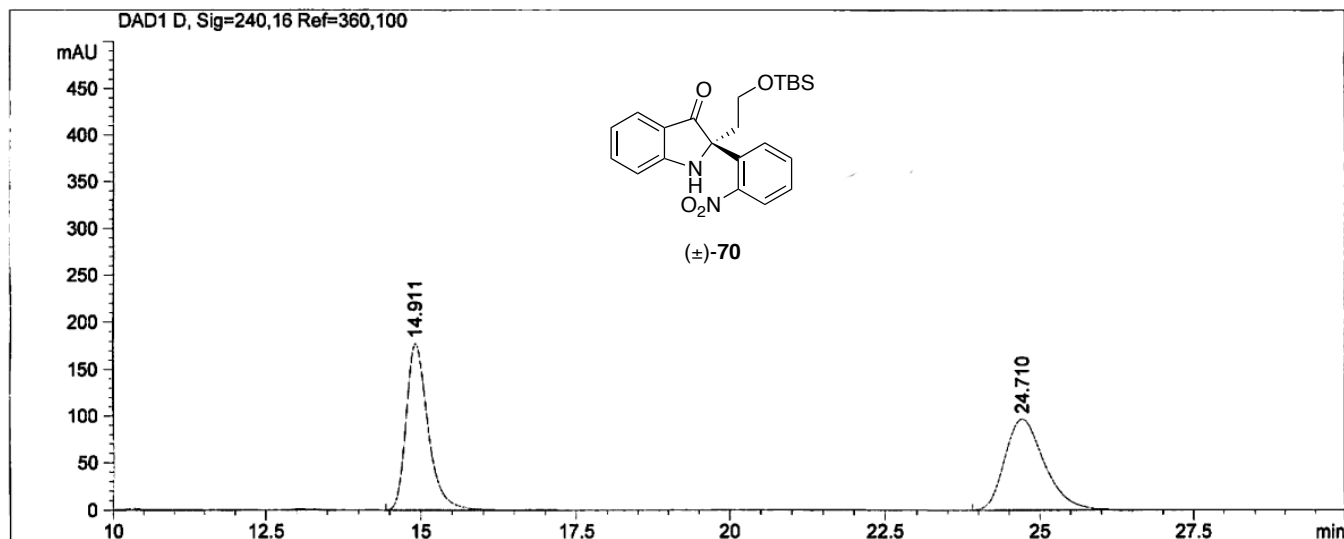

Area Percent Report

```
Sorted By      :      Signal
Multiplier     :      1.0000
Dilution       :      1.0000
Use Multiplier & Dilution Factor with ISTDs
```

Signal 1: DAD1 D, Sig=240,16 Ref=360,100

| Peak # | RetTime [min] | Type | Width [min] | Area [mAU*s] | Height [mAU] | Area %  |
|--------|---------------|------|-------------|--------------|--------------|---------|
| 1      | 14.911        | BB   | 0.3701      | 4303.46680   | 177.35651    | 50.1508 |
| 2      | 24.710        | BB   | 0.6603      | 4277.58594   | 96.65764     | 49.8492 |

Totals : 8581.05273 274.01414

Results obtained with enhanced integrator!

Summed Peaks Report

Signal 1: DAD1 D, Sig=240,16 Ref=360,100

chiralpak IC 83:17=Hx:IPA 0.5 mL/min

```
=====
Injection Date   :                               Seq. Line :    2
Sample Name     :                               Location  : Vial 92
Acq. Operator   : SH                           Inj          :    1
                                                Inj Volume   : 0 µl
Different Inj Volume from Sequence !      Actual Inj Volume : 5 µl
Acq. Method     :
Last changed    :

Analysis Method :
Last changed    :
=====
```

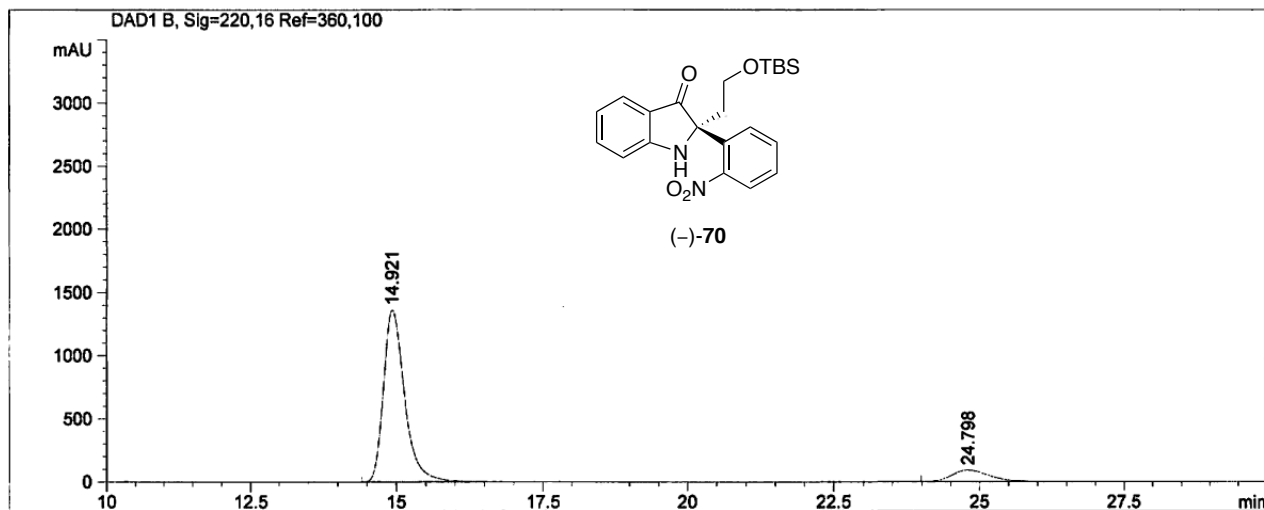

Area Percent Report

```
Sorted By      : Signal
Multiplier     : 1.0000
Dilution       : 1.0000
Use Multiplier & Dilution Factor with ISTDs
```

Signal 1: DAD1 B, Sig=220,16 Ref=360,100

| Peak # | RetTime [min] | Type | Width [min] | Area [mAU*s] | Height [mAU] | Area %  |
|--------|---------------|------|-------------|--------------|--------------|---------|
| 1      | 14.921        | BB   | 0.3776      | 3.41137e4    | 1364.64807   | 89.3473 |
| 2      | 24.798        | BB   | 0.6212      | 4067.29736   | 91.39735     | 10.6527 |

Totals : 3.81810e4 1456.04542

Results obtained with enhanced integrator!

Summed Peaks Report

Signal 1: DAD1 B, Sig=220,16 Ref=360,100
